1 **Manuscript**

2 *Prdm16* mutation determines sex-specific cardiac metabolism and identifies two  
3 novel cardiac metabolic regulators

4 Jirko Kühnisch<sup>1,2,3</sup>, Simon Theisen<sup>1,2,3</sup>, Josephine Dartsch<sup>1,2</sup>, Raphaela Fritsche-Guenther<sup>4</sup>,  
5 Marieluise Kirchner<sup>5,6</sup>, Benedikt Obermayer<sup>7</sup>, Anna Bauer<sup>4</sup>, Anne-Karin Kahlert<sup>8,9,10</sup>, Michael  
6 Rothe<sup>11</sup>, Dieter Beule<sup>2,7</sup>, Arnd Heuser<sup>2</sup>, Philipp Mertins<sup>5,6</sup>, Jennifer A. Kirwan<sup>4</sup>, Nikolaus  
7 Berndt<sup>12</sup>, Calum A. MacRae<sup>13</sup>, Norbert Hubner<sup>2,3</sup>, Sabine Klaassen<sup>1,2,3,14</sup>

8

9 *1 Experimental and Clinical Research Center, a cooperation between the Max Delbrück Center for*  
10 *Molecular Medicine in the Helmholtz Association and Charité - Universitätsmedizin Berlin, Germany;*

11 *2 Max Delbrück Center for Molecular Medicine in the Helmholtz Association (MDC), Berlin, Germany;*

12 *3 DZHK (German Centre for Cardiovascular Research), partner site Berlin, Berlin, Germany;*

13 *4 Berlin Institute of Health (BIH) at Charité - Universitätsmedizin Berlin, BIH Metabolomics Platform,*  
14 *Berlin, Germany;*

15 *5 Max-Delbrück-Center for Molecular Medicine in the Helmholtz Association (MDC), Proteomics*  
16 *Platform, Berlin, Germany;*

17 *6 Berlin Institute of Health (BIH) at Charité - Universitätsmedizin Berlin, Berlin, Germany;*

18 *7 Berlin Institute of Health at Charité - Universitätsmedizin Berlin, Core Unit Bioinformatics, Berlin,*  
19 *Germany;*

20 *8 Department of Congenital Heart Disease and Pediatric Cardiology, University Hospital of Schleswig-*  
21 *Holstein, Kiel, Germany;*

22 *9 German Center for Cardiovascular Research (DZHK), Kiel, Germany;*

23 *10 Institute of Immunology and Genetics, Kaiserslautern, Germany;*

24 *11 Lipidomix GmbH, Berlin, Germany;*

25 *12 Institute of Computer-Assisted Cardiovascular Medicine, Charité - Universitätsmedizin Berlin,*  
26 *corporate member of Freie Universität Berlin and Humboldt-Universität zu Berlin, Berlin, Germany*

27 *13 Harvard Medical School and Cardiovascular Division, Department of Medicine, Brigham and*  
28 *Women's Hospital, Boston, USA;*

29 *14 Department of Pediatric Cardiology, Charité - Universitätsmedizin Berlin, corporate member of*  
30 *Freie Universität Berlin and Humboldt-Universität zu Berlin, Berlin, Germany*

31

32 Correspondence to:

33 Jirko Kühnisch, PhD

34 Experimental and Clinical Research Center (ECRC),  
35 a joint cooperation between the Charité Medical Faculty  
36 and the Max Delbrück Center for Molecular Medicine (MDC),  
37 Lindenberger Weg 80, 13125 Berlin, Germany  
38 Phone: +4930 9406-3319, Fax: +49 30 9406-3358,  
39 Email: [jirko.kuehnisch@mdc-berlin.de](mailto:jirko.kuehnisch@mdc-berlin.de)

40

41 Sabine Klaassen, MD

42 Experimental and Clinical Research Center (ECRC),  
43 a joint cooperation between the Charité Medical Faculty  
44 and the Max Delbrück Center for Molecular Medicine (MDC),  
45 Lindenberger Weg 80, 13125 Berlin, Germany  
46 Phone: +4930 9406-3319, Fax: +49 30 9406-3358,  
47 Email: [klaassen@mdc-berlin.de](mailto:klaassen@mdc-berlin.de)

48

49

50 **Abstract**

51

52 **Background:** Mutation of the *PRDM16* gene has been associated with human  
53 cardiomyopathy. The PRDM16 protein is a transcriptional regulator affecting cardiac  
54 development via Tbx5 and Hand1 regulating myocardial structure. Biallelic *Prdm16*  
55 inactivation induces severe cardiac dysfunction with postnatal lethality and hypertrophy in  
56 mice. Early pathological events upon *Prdm16* inactivation have not been explored.

57

58 **Methods:** This study performed in depth pathophysiological and molecular analysis of male  
59 and female *Prdm16*<sup>csp1/wt</sup> mice carrying systemic, monoallelic *Prdm16* gene inactivation. We  
60 systematically assessed early molecular changes with transcriptomics, proteomics, and  
61 metabolomics. Kinetic modelling of the cardiac metabolism was undertaken *in silico* with  
62 CARDIOKIN.

63

64 **Results:** *Prdm16*<sup>csp1/wt</sup> mice are viable up to 8 months, develop hypoplastic hearts, and  
65 diminished systolic performance that is more pronounced in female mice. *Prdm16*<sup>csp1/wt</sup> hearts  
66 demonstrate moderate alterations of specific transcripts and protein levels with consistent  
67 upregulation of pyridine nucleotide-disulphide oxidoreductase domain 2 (Pyroxd2) and the  
68 transcriptional regulator pre B-cell leukemia transcription factor interacting protein 1 (Pbxip1).  
69 The strongest concordant transcriptional upregulation was detected for *Prdm16* itself  
70 probably by an autoregulatory mechanism. *Prdm16*<sup>csp1/wt</sup> cardiac tissue showed reduction of  
71 metabolites associated with amino acid as well as glycerol metabolism, glycolysis, and  
72 tricarboxylic acid cycle. Global lipid metabolism was also affected with accumulation of  
73 triacylglycerides detected in male *Prdm16*<sup>csp1/wt</sup> hearts. In addition, *Prdm16*<sup>csp1/wt</sup> cardiac  
74 tissue revealed diminished glutathione (GSH) and increased inosine monophosphate (IMP)  
75 levels indicating oxidative stress and a dysregulated energetics, respectively. Metabolic  
76 modelling *in silico* suggested lowered fatty acid utilization in male and reduced glucose  
77 utilization in female *Prdm16*<sup>csp1/wt</sup> cardiac tissue.

78

79 **Conclusions:** Monoallelic *Prdm16* mutation restricts cardiac performance in *Prdm16*<sup>csp1/wt</sup>  
80 mice. Metabolic alterations precede transcriptional dysregulation in *Prdm16*<sup>csp1/wt</sup> cardiac  
81 tissue. Female *Prdm16*<sup>csp1/wt</sup> mice develop a more pronounced phenotype indicating a sexual  
82 dimorphism at this early pathological window. This study suggests that metabolic  
83 dysregulation is an early event in *PRDM16* associated cardiac pathology.

84

85

86 **Novelty and Significance**

87

88 **What Is Known?**

- 89 - Mutation of the *PRDM16* gene has been associated with human cardiomyopathy.  
90 - Biallelic inactivation of *Prdm16* in mice induces severe cardiac dysfunction with early  
91 postnatal lethality.  
92 - *Prdm16* cooperates with transcription factors such as *Tbx5* and *Hand1* to activate  
93 transcriptional programs that define the development of the compacted myocardium.  
94

94

95 **What New Information Does This Article Contribute?**

- 96 - Systemic, monoallelic inactivation in *Prdm16*<sup>csp1/wt</sup> mice induces cardiac dysfunction  
97 with normal survival.  
98 - Metabolic alterations are the leading pathophysiological consequences and induce  
99 cardiac hypoplasia. On the molecular level this is associated with upregulation of  
100 metabolic regulators *Pyroxd2* and *Pbxip1*.  
101 - Metabolic response after *Prdm16* inactivation occurs in a sex specific manner.  
102

102

103

104 **Nonstandard Abbreviation and Acronyms**

|     |                                  |                                                                |
|-----|----------------------------------|----------------------------------------------------------------|
| 105 | DCM                              | dilated cardiomyopathy                                         |
| 106 | LVNC                             | left ventricular noncompaction cardiomyopathy                  |
| 107 | <i>Pbxip1</i>                    | pre B-cell leukemia transcription factor interacting protein 1 |
| 108 | <i>PRDM16</i>                    | human PR/SET domain 16 gene                                    |
| 109 | <i>PRDM16</i>                    | human PR/SET domain 16 protein                                 |
| 110 | <i>Prdm16</i>                    | mouse PR/SET domain 16 gene                                    |
| 111 | <i>Prdm16</i>                    | mouse PR/SET domain 16 protein                                 |
| 112 | <i>Prdm16</i> <sup>csp1/wt</sup> | mice carrying the <i>csp1</i> mutant allele heterozygous       |
| 113 | <i>Pyroxd2</i>                   | pyridine nucleotide-disulphide oxidoreductase domain 2         |

114

## 115 **Background**

116 Primary, genetically determined cardiomyopathies comprise a group of heterogenous cardiac  
117 diseases that eventually result in heart failure or arrhythmia. Approximately 100 genes have  
118 been linked to cardiomyopathy most frequently affecting the sarcomere, Z-disc,  
119 mitochondria, or ion channel regulation.<sup>1,2</sup> In addition to these disease circuits transcription  
120 and splicing may be disturbed in cardiomyopathy. The PR/SET domain 16 (PRDM16) protein  
121 is one such transcriptional regulator.<sup>3</sup> Mutation of the *PRDM16* gene causes dilated (DCM)  
122 and left ventricular noncompaction cardiomyopathy (LVNC) in patients.<sup>4-7</sup> Recently, rare  
123 variant association analysis linked LVNC to PRDM16 protein truncating variants.<sup>8</sup> Altogether,  
124 this suggests that *PRDM16* is a genetic factor critical for cardiac function either causing  
125 monogenic cardiomyopathy or other myocardial phenotypes.

126 Germline homozygous inactivation of *Prdm16* in *Prdm16<sup>csp1/csp1</sup>* mice results in a complex  
127 phenotype involving several organs, cardiac hypoplasia, and early postnatal lethality.<sup>9</sup> More  
128 recently, the role of *Prdm16* in myocardial development and LVNC was assessed after  
129 homozygous, cardiac-specific *Prdm16* inactivation in *Xmlc2Cre;Prdm16<sup>flox/flox</sup>* mice.<sup>10</sup>  
130 Homozygous *Xmlc2Cre;Prdm16<sup>flox/flox</sup>* mice develop cardiac dysfunction and die prematurely  
131 before postnatal day 7. During cardiac development, Prdm16 cooperates with the  
132 transcription factors T-box 5 (Tbx5) and heart and neural crest derivatives expressed 1  
133 (Hand1) to promote gene programs required for myocardial growth and compaction.<sup>10</sup>  
134 Prdm16 also suppresses neural gene expression.<sup>10</sup> Consequently, Prdm16 inactivation in  
135 *Xmlc2Cre;Prdm16<sup>flox/flox</sup>* mice leads to biventricular hypertrabeculation and left ventricular  
136 dilatation.<sup>10</sup> Overall, this work established that *Prdm16* is critical for embryonic cardiac  
137 development and postnatal function, orchestrating the transcriptional circuits determining  
138 myocardial maturation.

139 Originally, PRDM16 was established as a determinant for differentiation, homeostasis, and  
140 function of brown/beige adipocytes.<sup>11</sup> PRDM16 induces gene programs for the development  
141 of brown adipocytes, represses muscle/white adipocyte specific genes, induces adaptive  
142 thermogenesis, and increases energy expenditure.<sup>12-15</sup> On a molecular level these effects are  
143 facilitated by physical interaction and coordination of key transcription factors such as  
144 peroxisome proliferator activated receptor alpha, gamma (PPARA, PPARG), mediator  
145 complex subunit 1 (MED1), or CCAAT enhancer binding protein delta (CEBPD).<sup>12,16,17</sup> Of  
146 note, a significant number of these PRDM16 associated proteins serve as critical regulators  
147 of fatty acid (FA) metabolism, glucose utilization, and/or cellular respiration.

148 This study tests the hypothesis that PRDM16 orchestrates cardiac metabolism and  
149 investigates its role beyond its known transcriptional functions in cardiac development and  
150 homeostasis. We characterize the heart of heterozygous *Prdm16<sup>csp1/wt</sup>* mice in depth to

151 assess the impact of monoallelic germline *Prdm16* inactivation, as is present in patients with  
152 *PRDM16* associated cardiomyopathy. We explore early molecular events upon *Prdm16*  
153 inactivation and establish a preclinical animal model. *Prdm16*<sup>csp1/wt</sup> mice show diminished  
154 cardiac performance, normal survival, and altered body composition. Cardiac dysfunction is  
155 explained on the molecular level by altered metabolism, redox balance, and FA/glucose  
156 utilization. Overall, this study establishes heterozygous *Prdm16*<sup>csp1/wt</sup> mice as a model for  
157 early molecular pathomechanistic events in the development of the *PRDM16* associated  
158 cardiomyopathy.

159

160

161 **Methods**

162 The high-throughput sequencing data and proteome data have been made publicly available  
163 at the Gene Expression Omnibus (GEO accession No. ...) and the Proteomics Identification  
164 Database (PRIDE accession No. ...). Other data and study materials are available from the  
165 corresponding authors on reasonable request. Primer and antibodies used in this study are  
166 available (Table I and II in the Data Supplement). A detailed material and methods section is  
167 provided in the Supplemental Material. The *Prdm16<sup>csp1/wt</sup>* mice (FVB.C-*Prdm16<sup>csp1</sup>/J*) were  
168 received from Jackson Laboratories, USA (JAX stock #013100). The FVB.C-*Prdm16<sup>csp1</sup>/J*  
169 strain was originally established by N-ethyl-N-nitrosourea (ENU) mutagenesis inducing a  
170 missense C>A mutation at the intronic acceptor splice site of exon 7.<sup>9</sup> Maintenance,  
171 physiological analysis and organ collection of *Prdm16<sup>csp1/wt</sup>* mice was approved by the  
172 Landesamt für Gesundheit und Soziales Berlin (LAGeSo), Germany (G0070/17).  
173

## 174 Results

### 175 *Germline, heterozygous inactivation of Prdm16 induces mild cardiac dysfunction*

176 In human tissue RNA preparations *PRDM16* transcripts are most abundant in lung, followed  
177 by aorta, adipose tissues, and heart (Figure 1A). Consistently, murine tissue RNA extracts  
178 show approx. 10-fold higher *Prdm16* expression in lung compared to heart (Figure 1B).  
179 Within different heart regions *Prdm16* shows abundant expression in the right ventricle (RV),  
180 left ventricle (LV), and septum but not in the atria (Figure 1C). Potassium voltage-gated  
181 channel member 4 (*Kcna4*) and myosin light chain 2 (*Myl2*) confirmed atrial and ventricular  
182 origin, respectively. To assess clinically relevant physiological and molecular impact of  
183 *Prdm16* in the heart, rather than the effects of biallelic *Prdm16* gene inactivation, we  
184 analyzed heterozygous FVB.C-*Prdm16*<sup>csp1/J</sup> mice (*Prdm16*<sup>csp1/wt</sup>).<sup>9</sup> PCR genotyping and  
185 Sanger sequencing confirmed presence of the c.888-3C>A (ENSMUSG00000039410)  
186 variant on DNA level (Figure 1D, Figure I\_A-B in the Data Supplement). To further validate  
187 the impact of the *Prdm16* acceptor splice site variant c.888-3C>A  
188 (ENSMUST00000030902.12) at the transcriptional level, we performed PCR and targeted  
189 high throughput sequencing of total RNA isolated from different *Prdm16*<sup>wt/wt</sup> and *Prdm16*<sup>csp1/wt</sup>  
190 tissues. These analyses suggest that the *Prdm16* acceptor splice site variant c.888-3C>A  
191 affects mRNA splicing, produces several splice products, and the most abundant splice  
192 products truncate Prdm16 proteins after approx. 340 amino acids (Figure 1E-F, for detailed  
193 Results see Data Supplement).

194 Next, we tested *Prdm16* mutant transcript expression in the heart. *Prdm16* mutant transcripts  
195 are ~40% diminished compared to controls using primer sets targeting the mutated exon6-8  
196 region (Figure 1G, Figure I\_F in the Data Supplement). In contrast, primer sets measuring  
197 the overall *Prdm16* transcript level (exon3-4, exon14-15) detect increased expression in  
198 *Prdm16*<sup>csp1/wt</sup> hearts. This suggests that *Prdm16* inactivation due to the c.888-3C>A variant  
199 upregulates overall *Prdm16* mRNA expression. The Prdm16 protein level was assessed with  
200 a mass spectrometry-based targeted proteomics approach, measuring and quantifying the  
201 abundance of the peptide Prdm16\_V875-K883 (Figure 1H). As expected, a ~50% reduction  
202 of the Prdm16\_V875-K883 level was observed in *Prdm16*<sup>csp1/wt</sup> lung compared to controls  
203 (Figure 1I). In cardiac tissue the Prdm16\_V875-K883 detection limit was not reached.

204 The survival of *Prdm16*<sup>csp1/wt</sup> mice is normal until 8 months (Figure 2A). Male and female  
205 *Prdm16*<sup>csp1/wt</sup> mice exhibit body weight reduction by ~11% and ~20%, respectively (Figure  
206 2B, Table III in the Data Supplement). In female *Prdm16*<sup>csp1/wt</sup> mice diminished body weight  
207 was associated with reduced fat content (~14%) and increased relative muscle tissue content  
208 (~8%). The absolute and relative heart weight is diminished in both male and female  
209 *Prdm16*<sup>csp1/wt</sup> mice (Figure 2B). Transthoracic echocardiography was assed to characterize

210 the cardiac physiology of *Prdm16*<sup>csp1/wt</sup> mice. Echocardiography illustrates mild cardiac  
211 hypoplasia and reduced systolic functional parameters such as stroke volume, cardiac  
212 output, and ejection fraction (EF) (Figure 2C-D, Table IV-VI in the Data Supplement). Other  
213 cardiac parameters such as heart rate, systolic/diastolic blood pressure, or electrophysiology  
214 are unaffected in *Prdm16*<sup>csp1/wt</sup> mice. Cardiac tissue organization assessed by histology and  
215 hematoxylin/eosin staining appeared normal in *Prdm16*<sup>csp1/wt</sup> hearts (Figure 2E). Fibrosis was  
216 not detected, neither by Picro-Sirius red staining, nor by immunostaining of collagen 1 (Col1)  
217 and alpha smooth muscle actin ( $\alpha$ Sma) (Figure 2F, Figure III in the Data Supplement).  
218 Further analysis of *Prdm16*<sup>csp1/wt</sup> cardiac tissue with electron microscopy, morphometry,  
219 quantitative PCR, and immunostaining identified no abnormalities of the sarcomere (Figure  
220 IV in the Data Supplement, for detailed Results see Data Supplement). The relative  
221 mitochondrial area in heart tissue was unaffected. Cardiomyocyte area was assessed  
222 histomorphometrically in paraffin embedded heart tissue sections of comparable cross-  
223 sectional level after wheat germ agglutinin (WGA) staining. Cardiomyocytes of female  
224 *Prdm16*<sup>csp1/wt</sup> mice demonstrate significant reduction of cross-sectional area explaining  
225 reduced myocardial mass (Figure 2G). Normal viability, myocardial hypoplasia, and  
226 diminished cardiac performance due to monoallelic *Prdm16* inactivation suggests  
227 *Prdm16*<sup>csp1/wt</sup> mice as a suitable model to explore early pathophysiological changes in  
228 *PRDM16* associated cardiomyopathy.

229

### 230 *Moderate transcriptional dysregulation in Prdm16*<sup>csp1/wt</sup> hearts

231 *Prdm16* is a transcriptional regulator so we performed transcriptional profiling using RNAseq  
232 of heart tissue comparing male and female *Prdm16*<sup>csp1/wt</sup> mice with corresponding controls.  
233 Comparing female to male control heart tissue, we found 51 up-regulated and 92 down-  
234 regulated genes, applying an absolute log<sub>2</sub> fold change (LFC) threshold >0.5 (Figure 3A).  
235 Male *Prdm16*<sup>csp1/wt</sup> mice showed 12 up-regulated and 16 down-regulated genes compared to  
236 male controls. Female *Prdm16*<sup>csp1/wt</sup> mice revealed 55 up-regulated and 35 down-regulated  
237 genes, respectively. Transcriptional profiling identified most significant up-regulation of  
238 *Prdm16* in males and females suggesting an autoregulatory control of expression (Figure 3B-  
239 C). Other transcripts of the PRDM gene family were not regulated (Figure V\_A-B in the Data  
240 Supplement).

241 Next, the top 20 up- and down-regulated genes for males and females were evaluated. In  
242 male *Prdm16*<sup>csp1/wt</sup> mice we observed upregulation for MBL associated serine protease 2  
243 (*Masp2*), synapsin II (*Syn2*) a coat protein of clathrin-coated vesicles, and UbiA  
244 prenyltransferase domain containing 1 (*Ubiad1*) controlling coenzyme Q10 synthesis (Figure  
245 3D). We detected decreased levels of transcripts for synuclein alpha (*Snca*), hemoglobin



246 alpha adult chain 1 (*Hba-a1*), and hemoglobin subunit beta (*Hbb-ba*), which both  
247 supply/control intracellular oxygen. Female *Prdm16<sup>csp1/wt</sup>* cardiac tissue showed up-regulation  
248 of the extra cellular matrix CUB domain containing protein 1 (*Cdcp1*), laminin (*Lad1*) involved  
249 in basement membrane organization, the cell adhesion protein spondin 2 (*Spon2*), nuclear  
250 receptor subfamily 1, group D, member 1 (*Nr1d1*) a transcriptional repressor coordinating  
251 metabolic pathways, and nicotinamide riboside kinase 2 (*Nmrk2*) regulating laminin matrix  
252 deposition. Aldehyde dehydrogenase family 3, subfamily A1 (*Aldh3a1*) and gastrokine 3  
253 (*Gkn3*) showed strongest down-regulation in female *Prdm16<sup>csp1/wt</sup>* cardiac tissue. The top 20  
254 genes were tested for their cellular expression in heart tissue ([www.proteinatlas.org](http://www.proteinatlas.org)). Most  
255 genes showed a broad expression in cardiomyocytes, endothelial cells, fibroblasts, immune  
256 cells, and smooth muscle cells. Thus, no enrichment of cell lineage specific genes was  
257 found. The majority of dysregulated genes in male and female *Prdm16<sup>csp1/wt</sup>* cardiac tissue  
258 are associated with transcription (T), metabolism (M), and indirect/direct immune response  
259 (I).

260 Concordant and discordant changes in males vs. females were assessed with LFC  
261 significance threshold of >0.25 and <-0.25, respectively. Strongest concordant up-regulated  
262 genes in *Prdm16<sup>csp1/wt</sup>* hearts were *Prdm16*, *Lad1*, *Ubiad1*, and the pre B-cell leukemia  
263 transcription factor interacting protein 1 (*Pbxip1*) (Figure 3E). Systematic dysregulation of  
264 critical cardiac genes was tested using the harmonizome gene set *congenital heart disease*.  
265 Evaluation did not identify consistent, significant dysregulation of cardiac specific transcripts  
266 (Figure V\_C in the Data Supplement). Differentially expressed genes from *Prdm16<sup>csp1/wt</sup>*  
267 hearts (TOP5 up- and down-regulated genes) and known PRDM16 interacting genes  
268 (physical interaction, transcriptional targets, transcriptional complex component) were tested  
269 for dysregulation in a human DCM patients dataset.<sup>18</sup> From more than 60 known PRDM16  
270 targets *PPARA*, *MED1*, and *CEBPD* were dysregulated in the human DCM screen (Table VII  
271 in the Data Supplement). Moreover, the chemotactic factor 2 (*Ccl2*) was dysregulated in  
272 DCM patients and in male *Prdm16<sup>csp1/wt</sup>* mice. Sex specific gene expression validated correct  
273 technical procedures of RNAseq *Prdm16<sup>csp1/wt</sup>* mice analysis (Figure V\_D in the Data  
274 Supplement). Next, we generated a gene ontology (GO) network using the male and female  
275 TOP20 up- and down-regulated genes in *Prdm16<sup>csp1/wt</sup>* hearts (GOnet).<sup>19</sup> Strongest functional  
276 association of dysregulated genes in *Prdm16<sup>csp1/wt</sup>* hearts was found for the GO terms  
277 *response to lipids* and *response to oxygen-containing compounds* (Figure 3F, Figure V\_E in  
278 the Data Supplement). Thus, *Prdm16<sup>csp1/wt</sup>* hearts show moderate, sex specific transcriptional  
279 dysregulation with the strongest regulated transcripts being *Prdm16*, *Lad1*, *Ubiad1*, and  
280 *Pbxip1*. GO and individual transcript evaluation suggest an impact on metabolic processes  
281 after monoallelic *Prdm16* inactivation.

283 *Proteome analysis of Prdm16<sup>csp1/wt</sup> hearts reveals upregulation of Pbxip1 and Pyroxd2*

284 In order to verify findings from the transcriptional analysis and to assess cardiac tissue  
285 protein expression, we performed a global proteomic analysis of cardiac tissue. Consistent  
286 with RNAseq, male *Prdm16<sup>csp1/wt</sup>* cardiac tissue showed less variation from control than  
287 female samples. Of the 3,847 proteins identified in total, 3,314 were used for quantitation.  
288 Sample identity was confirmed by expression level of the male-specific DEAD box helicase  
289 3, Y-linked (Ddx3y) and eukaryotic translation initiation factor 2, subunit 3, structural gene Y-  
290 linked (Eif2s3y). The *Prdm16* protein was not detected, which can be explained by very low  
291 abundance below the limit of detection. Most significant differences in protein expression  
292 were observed between male and female cardiac tissue (165 proteins with FDR <5%, data  
293 not shown). Pairwise evaluation of control and *Prdm16<sup>csp1/wt</sup>* proteome data from male  
294 cardiac tissue using a p-value cutoff 0.01 showed upregulation of fermitin family member 2  
295 (Fermt2), coatamer protein complex, subunit zeta 2 (Copz2), and pyridine nucleotide-  
296 disulphide oxidoreductase domain 2 (Pyroxd2) (Figure 4A). Substantial downregulation was  
297 observed for c-src tyrosine kinase (Csk), translocase of inner mitochondrial membrane 10B  
298 (Timm10b), and collagen type XVIII, alpha 1 (Col18a1) proteins. Pairwise evaluation of  
299 proteome data from female cardiac tissue showed strongest upregulation of Pyroxd2,  
300 pyruvate dehydrogenase kinase, isoenzyme 4 (Pdk4), and pre B cell leukemia transcription  
301 factor interacting protein 1 (Pbxip1) in *Prdm16<sup>csp1/wt</sup>* mice (Figure 4B). Strongest  
302 downregulation was detected for cystic fibrosis transmembrane conductance regulator (Cftr),  
303 WNK lysine deficient protein kinase 1 (Wnk1), and huntingtin interacting protein 1 (Hip1).

304 To further assess *Prdm16* genotype driven differences, we performed also pairwise  
305 evaluation of combined male and female groups (p-value cutoff 0.01). In total we identified  
306 53 up- or downregulated proteins (Figure 4C, Figure VI in the Data Supplement). Pyroxd2,  
307 Pbxip1, and ribosomal protein L30 (Rpl30) appeared as the strongest concordantly  
308 upregulated proteins in *Prdm16<sup>csp1/wt</sup>* cardiac tissue. Furthermore, the strongest concordant  
309 downregulation was found for Cftr, Col18a1, and hexokinase 1 (Hk1) in *Prdm16<sup>csp1/wt</sup>* cardiac  
310 tissue. By adding an additional filter (abs log2 ratio >0.5), the top regulated proteins (n=18)  
311 were selected (Figure 4D). Among these, Pyroxd2 and Pbxip1 represent the two most  
312 significantly regulated candidates in *Prdm16<sup>csp1/wt</sup>* cardiac tissue (p-value<0.0001). Pyroxd2 is  
313 a critical regulator of hepatic mitochondrial function, interacts with mitochondrial complex IV,  
314 and appears consistently upregulated in *Prdm16<sup>csp1/wt</sup>* hearts on transcript as well as protein  
315 level.<sup>20</sup> Pbxip1 interacts with transport as well as regulatory proteins and indirectly affects  
316 transcription.<sup>21</sup> Proteome data did not show differential expression of mitochondrial transport  
317 proteins and respiratory chain complexes (Figure VII in the Data Supplement). Proteome  
318 data for sarcomere components, glycolysis, and amino acid metabolism did not show  
319 differential expression (Figure VIII in the Data Supplement). Altogether protein expression

320 analysis identifies specific dysregulation of the mitochondrial protein Pyroxd2 and the  
321 transcriptional regulator Pbxip1.

322

### 323 *Altered metabolism in Prdm16<sup>csp1/wt</sup> cardiac tissue*

324 As expression analysis pointed towards a metabolic impact of Prdm16 in cardiac tissue, we  
325 also analyzed central carbon metabolites in *Prdm16<sup>csp1/wt</sup>* cardiac tissue with gas  
326 chromatography mass spectrometry (GC-MS). Measured values are presented as log2 from  
327 ratio of mean of the normalized peak areas *Prdm16<sup>csp1/wt</sup>*/controls (values >0.2, blue and  
328 values <-0.2, red). Overall, we detected several diminished metabolites (log2 ratios  
329 *Prdm16<sup>csp1/wt</sup>*/controls) for all assessed metabolic processes (Figure 5A). In *Prdm16<sup>csp1/wt</sup>*  
330 cardiac tissue, amino acid, glycerol, pentose phosphate pathway (PPP), glycolysis,  
331 tricarboxylic acid cycle (TCA), and nucleobase metabolism were all reduced. Individual  
332 metabolite analysis of female *Prdm16<sup>csp1/wt</sup>* cardiac tissue revealed statistically significant  
333 reductions for glycerol-3-phosphate, phosphoenolpyruvic acid, succinic acid, and 3-hydroxy  
334 butanoic acid. Combined female and male cardiac tissue analysis identified significant  
335 reduction of phosphoenolpyruvic acid, pyruvic acid, and ribose-5-phosphate in *Prdm16<sup>csp1/wt</sup>*  
336 hearts. As interpretation of individual metabolites is difficult, we assessed the designated  
337 pathway profiles of central carbon metabolites with univariate analysis. Univariate analysis  
338 counts each increased/diminished metabolite as ordinary number. Combined pathways  
339 analysis using female and male values identified significant reduction of amino acid,  
340 glycolysis, glycerol, and TCA metabolism in *Prdm16<sup>csp1/wt</sup>* hearts (Figure 5B).

341 The adult heart mainly relies on FA oxidation as its primary substrate, so we next explored  
342 lipid metabolism with liquid chromatography-mass spectrometry (LC-MS) in depth. Values  
343 are presented as log2 from ratio *Prdm16<sup>csp1/wt</sup>*/controls (values >0.2, blue and values <-0.2,  
344 red). Evaluation of lipid classes did not reveal significant dysregulation. The strongest  
345 alterations were observed in male *Prdm16<sup>csp1/wt</sup>* hearts for triacylglycerol compounds (TAG;  
346 increase), dihydroceramides (DCER; reduction), and hexosylceramides (HCER; reduction)  
347 (Figure 5C). Currently, there is little known about dysregulation of individual lipid classes in  
348 early cardiac dysfunction.<sup>22,23</sup> Individual lipids are presented as log2 of ratio  
349 *Prdm16<sup>csp1/wt</sup>*/controls. Although accumulated lipid classes appear widely normal a minority of  
350 individual lipids were dysregulated (Figure IX\_A in the Data Supplement). Important FA such  
351 as oleic, linoleic,  $\alpha$ -linolenic, and arachidonic acid show moderate alteration (Figure 5D).  
352 Several diacylglycerols (DAG) appear strongly reduced in *Prdm16<sup>csp1/wt</sup>* hearts for instance  
353 DAG(16:1/18:0), which was altered in a study assessing lipid profiles in human heart  
354 failure.<sup>23</sup> DAG(18:1/20:4), which was significantly altered on lipidomic profiling of murine  
355 hearts after exercise or pressure overload, was normal in *Prdm16<sup>csp1/wt</sup>* hearts.<sup>22</sup> Enrichment

356 of individual TAG was significant for TAG47:2-FA18:2, TAG50:4-FA20:4, and TAG51:4-  
357 FA18:3 in male and to lesser degree in female *Prdm16<sup>csp1/wt</sup>* cardiac tissue. The sphingolipids  
358 sphingomyelin SM(14:0), dihydroceramide DCER(16:0), and ceramide CER(22:1) show  
359 strongest reduction in male *Prdm16<sup>csp1/wt</sup>* cardiac tissue. The hexosylceramide,  
360 HCER(d18:1/16:0) appeared diminished in hearts of both *Prdm16<sup>csp1/wt</sup>* sexes. Several  
361 protective and risk predictive sphingolipids identified by *Wittenbecher et al.*<sup>23</sup> were  
362 unaffected in *Prdm16<sup>csp1/wt</sup>* mice. The global levels of the cardiac phospholipids  
363 phosphatidylcholine (PC) and phosphatidylethanolamine (PE) were unaffected (Figure 5C).  
364 Individual PC and PE species appeared consistently enhanced (e.g. PC(18:2/18:3),  
365 PE(17:0/22:5), PE(P-18:0/18:0)) or decreased (e.g. PC(18:1/16:1), PE(P-18:1/18:1), PE(P-  
366 18:1/18:2)) in *Prdm16<sup>csp1/wt</sup>* hearts of both sexes (Figure IX\_B in the Data Supplement). The  
367 level of cardiolipin (CA(18:2(4))), a phospholipid critical for mitochondrial function, appeared  
368 moderately elevated in male *Prdm16<sup>csp1/wt</sup>* hearts (Figure 5D). Thus, global lipid metabolism  
369 is altered in male *Prdm16<sup>csp1/wt</sup>* hearts with accumulation of TAG.

370 Cardiac metabolism is controlled by the mitogen-activated protein kinase (MAPK) and  
371 mechanistic target of Rapamycin (mTOR) pathways. Using the Milliplex phosphoprotein  
372 magnetic bead system we tested the phosphorylation level of key proteins from relevant  
373 pathways. Female *Prdm16<sup>csp1/wt</sup>* hearts showed significant inactivation of insulin receptor  
374 (Insr\_Tyr1162-1163), phosphatase and tensin homolog (Pten\_Ser380), and Akt  
375 serine/threonine kinase 2 (Akt\_Ser473) phosphorylation (Figure 5E). mTOR phosphorylation  
376 activation at Mtor\_Ser2448 and tuberin (Tsc2\_Ser939) showed increased phosphorylation  
377 without reaching statistical significance. Thus, diminished phosphorylation of the Insr/Akt  
378 pathway activates mTOR signaling and cardiac metabolism adapts accordingly. Altogether,  
379 *Prdm16<sup>csp1/wt</sup>* hearts show multiple, substantial metabolic alterations suggesting that  
380 monoallelic *Prdm16* inactivation affects cardiac metabolism.

381

### 382 *Tissue energetics and production of protective lipids in Prdm16<sup>csp1/wt</sup> hearts*

383 To further explore the consequences of the imbalanced cardiac metabolism in *Prdm16<sup>csp1/wt</sup>*  
384 mice, we tested the steady-state levels of important cardiac metabolic intermediates, redox  
385 molecules, and eicosanoids. Global adenosine triphosphate (ATP) levels were unaffected in  
386 *Prdm16<sup>csp1/wt</sup>* cardiac tissue (Figure 6A, Table VIII in the Data Supplement). However, the  
387 ratio of adenosine monophosphate to ATP (AMP/ATP) was significantly increased in female  
388 *Prdm16<sup>csp1/wt</sup>* hearts. AMP is a critical molecule for sensing metabolic stress conditions and  
389 the increased AMP/ATP ratio suggests an abnormal energy state in the *Prdm16<sup>csp1/wt</sup>* cardiac  
390 tissue. We also detected increased absolute and relative inosine monophosphate (IMP)  
391 values in both male and female *Prdm16<sup>csp1/wt</sup>* hearts (Figure 6B). IMP is the key molecule in

392 purine metabolism and a sensitive measure of the ATP turnover.<sup>24</sup> The level of hypoxanthine,  
393 which serves as precursor and degradation product of IMP, was elevated in male  
394 *Prdm16<sup>csp1/wt</sup>* hearts. The ratio of reduced to oxidized nicotinamide adenine dinucleotide  
395 (NADH/NAD<sup>+</sup>), serving as central hydride donor for oxidative phosphorylation and in many  
396 other redox reactions<sup>25</sup>, was increased in female *Prdm16<sup>csp1/wt</sup>* hearts (Figure 6C). The ratio  
397 of reduced to oxidized glutathione (GSH/GSSG) was diminished in female *Prdm16<sup>csp1/wt</sup>*  
398 hearts suggesting accelerated cellular GSH consumption and redox imbalance (Figure 6D).  
399 The levels of creatine, phosphor-creatine/creatine, and acetyl-CoA appeared normal. The  
400 level of 4-hydroxynonenal (4-HNE), a marker of lipid peroxidation, was unaffected. These  
401 findings suggest accelerated ATP turnover and oxidative stress but no lipid peroxidation on  
402 *Prdm16* inactivation in particular in female *Prdm16<sup>csp1/wt</sup>* hearts.

403 Apart from their function as nutritional source FA serve as reactant for biosynthesis of  
404 hydroxyeicosatetraenoic acids (HETE) and epoxyeicosatrienoic acids (EET)<sup>26,27</sup>. All HETE  
405 species, which are synthesized from arachidonic acid, FA(20:4) by lipoxygenases (LOX),  
406 were normal in male *Prdm16<sup>csp1/wt</sup>* cardiac tissue (Figure 6E, Table IX in the Data  
407 Supplement). 20-HETE, which is synthesized from FA(20:4) by cytochrome P450 (CYP), was  
408 also unaffected. All tested individual EET, which originate from CYP activity, and summed  
409 EET were significantly increased. Consistently, also the water soluble  
410 dihydroxyeicosatrienoic acids (DHET), representing the corresponding EET hydrolyzation  
411 products, were significantly increased. The anti-inflammatory 19,20-epoxydocosapentaenoic  
412 acid (19,20-EDP) and 17,18-epoxyeicosatetraenoic acid (17,18-EEQ) were also significantly  
413 increased. These observations suggest activation of CYP mediated bioactive, lipid  
414 production (EETs and 19,20-EDP) in male *Prdm16<sup>csp1/wt</sup>* cardiac tissue.

415 To assess the global metabolism of *Prdm16<sup>csp1/wt</sup>* cardiac tissue, we modelled major  
416 metabolic pathways with CARDIOKIN1 *in silico*. As input data we used quantitative protein  
417 expression data of metabolically important proteins measured with LC-MS/MS (Figure 4).  
418 The calculated maximal utilization rates of the given metabolic condition are upper estimates  
419 that will probably not be reached under physiological conditions. However, these maximal  
420 utilization rates allow estimation of the physiological capacity. The maximal FA and glucose  
421 utilization rates were different between cardiac the tissue of male and female control hearts.  
422 Females had lower FA but higher glucose utilization capacity compared to male controls  
423 (Figure 6F). In addition, the maximal lactate utilization rate was lower in female controls. In  
424 male *Prdm16<sup>csp1/wt</sup>* cardiac tissue the maximal FA utilization was decreased but unaffected in  
425 females. In contrast, female *Prdm16<sup>csp1/wt</sup>* cardiac tissue had a diminished maximal glucose  
426 utilization, while the males were unaffected. Maximal lactate utilization was increased in  
427 female *Prdm16<sup>csp1/wt</sup>* cardiac tissue. Maximal ATP production and O<sub>2</sub> consumption were  
428 modelled under fasting and postprandial conditions. Under both conditions the cardiac tissue

429 of female controls showed diminished maximal ATP production and O<sub>2</sub> consumption  
430 compared to male controls (Figure X in the Data Supplement). The maximal utilization rate  
431 gives a net measure involving several members of the given metabolic pathway. Thus, we  
432 aimed to identify enzymes critical for FA and glucose metabolism in *Prdm16<sup>csp1/wt</sup>* cardiac  
433 tissue. For this purpose, the metabolic utilization and protein abundance was correlated for  
434 each protein and animal. The strongest correlations, indicated by low p-values, were  
435 identified for carnitine palmitoyltransferase 2 (Cpt2), acetyl-CoA acyltransferase 2 (Acaa2),  
436 hexokinase 1 (Hk1), and others (Figure 6G, Figure XI in the Data Supplement). In controls,  
437 Cpt2 and Acaa2, two determinants of the mitochondrial beta-oxidation activity, showed lower  
438 maximal capacity in females supporting their diminished FA metabolism (Figure 6G, Figure  
439 XII in the Data Supplement). Lower Cpt2 capacity in male *Prdm16<sup>csp1/wt</sup>* cardiac tissue partly  
440 explains diminished male FA metabolism. Consistent with protein expression data, female  
441 and male *Prdm16<sup>csp1/wt</sup>* cardiac tissue showed diminished Hk1 utilization. Hk1 mediates  
442 phosphorylation of D-glucose to D-glucose 6-phosphate and represents the initial step of  
443 glycolysis. Altogether, these findings support imbalanced substrate metabolism and oxidative  
444 stress on monoallelic *Prdm16* inactivation.

## 445 Discussion

446 Our study suggests that metabolic dysregulation is an early event in *Prdm16* associated  
447 cardiac dysfunction and precedes substantial transcriptional dysregulation. Metabolic  
448 changes upon *Prdm16* inactivation appear to contribute to induce early and late-stage  
449 cardiac pathologies, which may result in cardiac hypoplasia<sup>9</sup> and hypertrophy<sup>28</sup>, respectively.  
450 Pyroxd2 and Pbxip1 are novel modulators of cardiac function, reflecting the central role of  
451 metabolism in the *Prdm16* associated cardiac phenotype. Moreover, our study detects a  
452 more pronounced molecular and structural phenotype in *Prdm16*<sup>csp1/wt</sup> females than males,  
453 with sex having a larger effect than the *Prdm16* genotype. The differential response in  
454 maximal FA and glucose utilization of male and female *Prdm16*<sup>csp1/wt</sup> hearts suggest a  
455 diminished capacity of females to cope with metabolic challenges.

456

### 457 *PRDM16* cardiomyopathy.

458 Mutation of *PRDM16* is a cause of cardiomyopathy associated with DCM and LVNC.<sup>4</sup> More  
459 recently, truncating variants in *PRDM16* were identified by *in silico* analysis as one of three  
460 specific LVNC variant classes.<sup>8</sup> These genetic observations and the *Prdm16*<sup>csp1/wt</sup> phenotype  
461 reinforce the human genetic case that heterozygous *PRDM16* inactivation/truncation is  
462 sufficient to cause cardiomyopathy. Functional evidence from *Prdm16*<sup>csp1/wt</sup> mice, mirroring  
463 the genotype of patients with *PRDM16* mutation, will increase the ClinGen evidence from  
464 *limited* to *moderate* for the association of *PRDM16* with cardiomyopathy  
465 ([www.clinicalgenome.org](http://www.clinicalgenome.org)).

466 In mice, homozygous *Prdm16* inactivation induces discordant phenotypes in different genetic  
467 backgrounds resulting in either early postnatal lethality (*Xmlc2Cre;Prdm16*<sup>fllox/fllox</sup>) or cardiac  
468 dysfunction with fibrosis at adult stages (*Mesp1Cre;Prdm16*<sup>fllox/fllox</sup>,  
469 *Myh6Cre;Prdm16*<sup>fllox/fllox</sup>).<sup>10,28,29</sup> *Xmlc2Cre* and *Mesp1Cre* strains are expected to inactivate  
470 *Prdm16* upon very early heart development.<sup>30</sup> Discrepancies in penetrance of the  
471 phenotypes could be attributed to incomplete spatial Cre-mediated *Prdm16* inactivation and  
472 residual *Prdm16* levels in early cardiomyocyte progenitor cells, endothelia, or cardiac  
473 fibroblasts. Consistent with neuronal studies, it is likely that *Prdm16* has additional effects on  
474 cardiac stem and progenitor cell function compared with differentiated, adult  
475 cardiomyocytes.<sup>31</sup> Indeed, adult *Prdm16* inactivation using a tamoxifen-inducible mouse  
476 model (*αMHC-MerCreMer;Prdm16*<sup>fllox/fllox</sup>) resulted in viable mice without an overt cardiac  
477 phenotype.<sup>10</sup> Homozygous *PRDM16* mutation has not been identified in patients so far but  
478 based on animal studies<sup>10,28,29</sup>, biallelic *PRDM16* inactivation likely induces a highly  
479 penetrant, severe cardiac phenotype in humans that may not survive to birth. In *Prdm16*<sup>csp1/wt</sup>

480 hearts we did not observe alterations in myocardial compaction or alterations of the gene  
481 circuit involving Tbx5 and Hand1.<sup>10</sup> This is possibly due to the heterozygous nature of the  
482 *Prdm16* inactivation in our model. Another important feature is that *Prdm16*<sup>csp1/wt</sup> hearts do  
483 not show perturbation of the sarcomere at either a structural or a molecular level. This  
484 suggests that contractile dysfunction in the *PRDM16* cardiomyopathy originates from other  
485 mechanisms such as energy restriction or metabolic stress affecting contractility and/or ion  
486 homeostasis.

487

488 *Prdm16* differentially compromises metabolism in early and late stage cardiac pathology.

489 Studies from adipose tissue show that PRDM16 orchestrates adipocyte differentiation via  
490 interaction with proteins such as PPARA, PPARG, MED1, CEBPD, peroxisome proliferator-  
491 activated receptor gamma coactivator 1-alpha, beta (PPARGC1A, PPARGC1B), or  
492 uncoupling protein 1 (UCP1).<sup>3,12,13,15-17,32,33</sup> Consequently, we explored a selection of  
493 validated PRDM16 targets in *Prdm16*<sup>csp1/wt</sup> hearts and in a transcriptomic screen of human  
494 adult DCM (Table VII in the Data Supplement).<sup>18</sup> We found only three PRDM16 targets,  
495 namely PPARA, MED1, and CEBPD dysregulated in this DCM transcriptomic screen.  
496 Moreover, the transcriptional targets Tbx5, Hand1 identified in *Xmlc2Cre;Prdm16*<sup>flox/flox</sup> hearts  
497 appeared not be regulated in *Prdm16*<sup>csp1/wt</sup> hearts.<sup>10</sup> This suggests: *i*) in cardiomyocytes  
498 PRDM16 steers diverse regulatory programs compared to other differentiated cell types, *ii*)  
499 expression changes are time sensitive and depend on the progenitor or differentiation stage,  
500 and *iii*) early molecular changes or adaptations in PRDM16 cardiac pathology are not  
501 associated with broad, significant expression changes. In the absence of major  
502 transcriptional effects in our model, we investigated possible metabolic alterations.

503 The initial evidence that metabolic alteration may be associated with the cardiac *PRDM16*  
504 phenotype came from a study analyzing homozygous *Mesp1Cre;Prdm16*<sup>flox/flox</sup> mice. These  
505 mice develop cardiac hypertrophy, diminished heart function, fibrosis, reduced mitochondrial  
506 content, and diminished acylcarnitine levels at 12 months of age.<sup>28</sup> *Mesp1Cre;Prdm16*<sup>flox/flox</sup>  
507 hearts show upregulation of transcripts involved in glucose metabolism, transcriptional  
508 downregulation of lipid metabolism, and oxidative stress gene expression. Metabolic high-fat  
509 diet challenge of young *Mesp1Cre;Prdm16*<sup>flox/flox</sup> mice induced cardiac dysfunction as well as  
510 hypertrophy already at 3 months of age compared to a later phenotype onset at 9 months  
511 without high-fat diet. This suggests that complete *Prdm16* inactivation in the heart leads to  
512 diminished mitochondrial volume and sensitivity to substrate availability ultimately resulting in  
513 cardiomyocyte hypertrophy by activating distinctive gene programs.<sup>28</sup> Exploration of the heart  
514 phenotype in *Xmlc2Cre;Prdm16*<sup>flox/flox</sup> mice also detected downregulation of transcripts  
515 associated with mitochondrial biogenesis/function and FA metabolism.<sup>10</sup> Together, both



516 models analyzing homozygous *Prdm16* inactivation demonstrate cardiac phenotypes that are  
517 associated with diminished metabolic capacity eventually leading to cardiac growth and  
518 hypertrophy. In contrast, heterozygous *Prdm16*<sup>csp1/wt</sup> hearts are hypoplastic with no evidence  
519 of mitochondrial volume changes, demonstrating that metabolic alterations are early events  
520 in *Prdm16* inactivation.

521 A differential response in maximal FA or glucose utilization of male and female *Prdm16*<sup>csp1/wt</sup>  
522 is supported by sex-specific transcriptional dysregulation. In male *Prdm16*<sup>csp1/wt</sup> hearts the  
523 strongest up- and downregulation was observed for *Ubiad1* and hemoglobin's (*Hba-a1*, *Hbb-*  
524 *bs*), respectively. *Ubiad1* is a prenyltransferase that is involved in ubiquinone (CoQ10)  
525 synthesis, thus, increasing redox tolerance and providing cardiovascular protection.<sup>34</sup>  
526 Cellular downregulation of *Hba-a1* and *Hbb-ba* diminishes oxygen supply and may blunt  
527 cardiac oxidative stress in the setting of restricted FA oxidation. Female *Prdm16*<sup>csp1/wt</sup> hearts  
528 show strongest up- and downregulation of the metabolism associated transcripts *Nr1d1* and  
529 *Aldh3a1*, respectively. NR1D1 is a ligand-regulated transcriptional repressor impacting  
530 metabolic regulation, cellular differentiation, or circadian rhythm control.<sup>35</sup> Upon  
531 adipogenesis, *Nr1d1* gene silencing affects brown adipocyte differentiation and attenuates  
532 *Prdm16* expression suggesting an interaction of both.<sup>35</sup> A recent study exploring the impact  
533 of shift work on cardiac reperfusion injury demonstrated diminished myocardial *Nr1d1*  
534 expression suggesting a more general role of *Nr1d1* in cardiomyocyte function.<sup>36</sup> *Aldh3a1* is  
535 involved in oxidation and detoxification of lipid peroxids. Genetic inactivation of *Aldh3a1* in  
536 zebrafish increases 4-HNE levels and impairs glucose homeostasis.<sup>37</sup> Thus, *Aldh3a1*  
537 reduction is likely associated with metabolic adaptation of female *Prdm16*<sup>csp1/wt</sup> glucose  
538 utilization. Overall, early transcriptional changes in *Prdm16*<sup>csp1/wt</sup> hearts are distinct from  
539 those observed in later stage pathology.

540

541 *Pyroxd2* and *Pbxip1* are novel modulators of cardiac function.

542 In line with a central role of metabolism for PRDM16-associated cardiac phenotypes, we  
543 found concordant upregulation of *Pyroxd2* and *Pbxip1* both of which have been implicated in  
544 the regulation of energy metabolism. PBXIP1 interacts with several proteins such as the  
545 transcription factor Pre-B cell leukemia factor 1 (PBX1)<sup>38</sup>, microtubules<sup>38</sup>, estrogen receptors  
546 1 and 2 (ESR1, ESR2)<sup>39</sup>, and AMP-activated protein kinase (AMPK).<sup>40</sup> Moreover, PBXIP1  
547 regulates the activity of MAPK and mTOR signaling.<sup>21</sup> The function of *Pbxip1* in the heart is  
548 largely unknown. In a prior genetic screen, the inhibition of MAPK signaling pathway proteins  
549 increased PBXIP1 phosphorylation.<sup>41</sup> In contrast, activation of the MAPK signaling cascade  
550 increased PBXIP1 protein expression and murine PBXIP1 overexpression stimulated cardiac  
551 hypertrophy.<sup>41</sup> In *Prdm16*<sup>csp1/wt</sup> hearts we found *Pbxip1* upregulation associated with

552 diminished MAPK signaling activity. Mutation of *PBXIP1* has not been associated with  
553 human heart disease; however, mutation of its interacting transcription factor PBX1 has been  
554 linked to syndromic congenital heart defects.<sup>42</sup> An interesting aspect of PBXIP1 is its  
555 interaction and activation of ESR1 and ESR2, a potential mechanisms of sex specific  
556 effects.<sup>39</sup> Our data implicate PBXIP1 in cardiac growth, metabolism, and hypertrophy which  
557 await further characterization under healthy and diseased conditions. In the context of  
558 *Prdm16* heterozygous mutants, *Pbxip1* may orchestrate the adaptive responses of important  
559 signaling cascades like AMPK, mTOR, or MAPK.

560 The cardiac function of *Pyroxd2* is unknown. PYROXD2 is an oxidoreductase of the inner  
561 mitochondrial membrane/matrix that interacts with mitochondrial complex IV.<sup>20</sup> Genetic  
562 inactivation of PYROXD2 in hepatic cell lines decreased the mitochondrial membrane  
563 potential, complex IV activity, ATP content, and mitochondrial DNA copy number.<sup>20</sup>  
564 PYROXD2 inactivation also increased mitochondrial reactive oxygen species and the  
565 number of immature mitochondria.<sup>20</sup> Compound heterozygous genetic variants in *PYROXD2*  
566 were detected in a single patient with a severe infantile metabolic disorder.<sup>43</sup> Molecular  
567 workup in patient fibroblasts demonstrated a mito-ribosomal defect characterized by  
568 increased mitochondrial superoxide levels, elevated sensitivity to metabolic stress,  
569 decreased complex I subunit proteins, and diminished mitochondrial ribosome levels.<sup>43</sup>  
570 Mutation of a related human oxidoreductase, *PYROXD1*, results in early-onset skeletal  
571 myopathy.<sup>44</sup> Another study, investigating molecular signatures in skeletal muscle from heart  
572 failure patients, detected upregulation of *PYROXD2* transcripts.<sup>45</sup> These data suggest that  
573 *Pyroxd2* upregulation in *Prdm16*<sup>csp1/wt</sup> hearts may compensate for metabolic and oxidative  
574 stress conditions.

575

576 *Sex specific aspects of Prdm16 inactivation in cardiac metabolism.*

577 Our study detects a more pronounced cardiac and molecular phenotype in *Prdm16*<sup>csp1/wt</sup>  
578 females compared to males. The original cytogenetic association of *PRDM16* inactivation  
579 with cardiomyopathy was described in 18 patients with 1p36 syndrome.<sup>4</sup> Among these, 16  
580 individuals were females and only two were males.<sup>4</sup> This may point to a sex specific  
581 penetrance of the *PRDM16* cardiomyopathy. Apparently, female *Prdm16*<sup>csp1/wt</sup> mice  
582 compensate the cardiac metabolic disturbance less efficiently than males. Metabolic  
583 modelling with CARDIOKIN1 revealed diminished FA, increased glucose, and reduced  
584 lactate utilization in the hearts of female compared with male *Prdm16*<sup>wt/wt</sup> mice.<sup>46</sup> This  
585 establishes clear sexual dimorphism for cardiac metabolism under basal healthy conditions.<sup>47</sup>  
586 Under normal conditions the heart generates ATP mainly via FA oxidation and glucose  
587 utilization (glycolysis, pyruvate supply to TCA).<sup>48</sup> Female *Prdm16*<sup>csp1/wt</sup> hearts show

588 diminished maximal glucose and unaffected FA utilization. The increase in the maximal  
589 lactate utilization capacity in female *Prdm16*<sup>csp1/wt</sup> hearts likely reflects an adaptation to  
590 metabolic stress conditions. Male *Prdm16*<sup>csp1/wt</sup> hearts show diminished maximal FA  
591 utilization, which is in line with the TAG accumulation we observed. Male *Prdm16*<sup>csp1/wt</sup> hearts  
592 expose elevated EET levels, which is in line with a recent study demonstrating increased  
593 EET levels/turnover in LV biopsies from DCM patients.<sup>49</sup> This supports distinct mechanisms  
594 of lipid metabolism in male hearts. Whether hormonal differences are the cause of  
595 systemically reduced fat content and the more advanced pathology in female *Prdm16*<sup>csp1/wt</sup>  
596 mice is unclear. The known association of *Pbxip1* and *Esr1/Esr2* activity as well as *Nr1d1*  
597 provides a potential explanation for the sexual dimorphism in the regulation of substrate  
598 utilization. Transcript as well as protein level of *Prdm16*<sup>csp1/wt</sup> hearts demonstrate significant  
599 sex effects. Indeed, sex has a larger effect on metabolic parameters than the *Prdm16*  
600 genotype at least during this investigated early pathological window. Our findings suggest a  
601 sexual dimorphism for the *PRDM16* associated cardiomyopathy with probably earlier, more  
602 penetrant phenotype expression in females.

## 603 **Study Limitations**

604 Female *Prdm16*<sup>csp1/wt</sup> mice have diminished relative total body fat content and increased  
605 relative muscle content. This mirrors either the female tissue specific metabolism and/or  
606 points towards a systemic factor affecting tissue development. Identification of such factor  
607 would be important to understand the systemic (endocrine) role of Prdm16 and to test  
608 therapeutic approaches targeting adipose tissue. Our study does not assess early metabolic  
609 changes in cardiac progenitor cells. Analysis of *Prdm16*<sup>csp1/wt</sup> hearts with *in silico* tools and  
610 individual metabolite measurements suggest an accelerated metabolism. However, we did  
611 not perform kinetic experiments to demonstrate accelerated turnover of selected metabolic  
612 pathways.

## 613 **Acknowledgments**

614 We thank the Berlin Institute of Health (BIH), Core Facility Genomics, Berlin, Germany for  
615 providing the high throughput sequencing platform (Tatjana Borodina). The MDC, animal  
616 phenotyping facility performed mouse physiological experiments (Stefanie Schelenz, Martin  
617 Taube). We thank the Advanced Light Microscopy Technology Platform of the Max-Delbrück-  
618 Center for Molecular Medicine, Berlin for the general and technical support (Anca  
619 Margineanu, Anje Sporbert). We thank the Charité electron microscopy facility (Petra  
620 Schrade, Sara Timm, Matthias Ochs). We thank the MS Omics for metabolic analysis (Lea  
621 Johnsen, Morten Danielsen).

622

## 623 **Sources of Funding**

624 The study was funded by a Berlin Institute of Health (BIH) twinning research grant to SK and  
625 NH. The German Centre for Cardiovascular Research, Deutsches Zentrum für Herz-  
626 Kreislauf-Forschung e.V. (DZHK), partner site Berlin supported ST with a doctoral  
627 scholarship and SK with a research grant 81Z0100216. NB was supported by the  
628 Bundesministerium für Bildung und Forschung (German Federal Ministry of Education and  
629 Research), under the frame of ERA PerMed, as well as by the Deutsche  
630 Forschungsgemeinschaft (DFG, German Research Foundation) – SFB-1470 – A08; and  
631 project number 422215721.

632

## 633 **Disclosures**

634 All authors declare to have no conflict of interest related to this manuscript.

## 635 **ORCID**

636 Berndt, Nikolaus - <https://orcid.org/0000-0001-5594-9940>  
637 Beule, Dieter - <https://orcid.org/0000-0002-3284-0632>  
638 Dartsch, Josephine - <https://orcid.org/0000-0002-7947-2881>  
639 Fritsche-Guenther, Raphaela - <https://orcid.org/0000-0002-6965-0226>  
640 Heuser, Arnd - <https://orcid.org/0000-0002-3334-960X>  
641 Huebner, Norbert - <https://orcid.org/0000-0002-1218-6223>  
642 Kahlert, Anne-Karin - <https://orcid.org/0000-0002-3201-2642>  
643 Kirchner, Marieluise - <https://orcid.org/0000-0002-7049-534X>  
644 Kirwan, Jennifer - <https://orcid.org/0000-0002-5423-1651>  
645 Klaassen, Sabine - <https://orcid.org/0000-0001-5925-9912>  
646 Kühnisch, Jirko - <https://orcid.org/0000-0003-4744-5421>  
647 MacRae, Calum A. - <https://orcid.org/0000-0001-5181-2664>  
648 Mertins, Philipp - <https://orcid.org/0000-0002-2245-528X>  
649 Obermayer, Benedikt - <https://orcid.org/0000-0002-9116-630X>  
650 Rothe, Michael - <https://orcid.org/0000-0002-6813-4705>

651

## 652 References

653

- 654 1. Burke MA, Cook SA, Seidman JG, Seidman CE. Clinical and Mechanistic Insights Into the  
655 Genetics of Cardiomyopathy. *Journal of the American College of Cardiology*. 2016;68:2871-  
656 2886. doi: 10.1016/j.jacc.2016.08.079
- 657 2. Kuhnisch J, Herbst C, Al-Wakeel-Marquard N, Dartsch J, Holtgrewe M, Baban A, Mearini G,  
658 Hardt J, Kolokotronis K, Gerull B, et al. Targeted panel sequencing in pediatric primary  
659 cardiomyopathy supports a critical role of TNNI3. *Clinical genetics*. 2019;96:549-559. doi:  
660 10.1111/cge.13645
- 661 3. Ishibashi J, Seale P. Functions of Prdm16 in thermogenic fat cells. *Temperature*. 2015;2:65-  
662 72.
- 663 4. Arndt AK, Schafer S, Drenckhahn JD, Sabeh MK, Plovie ER, Caliebe A, Klopocki E, Musso G,  
664 Werdich AA, Kalwa H, et al. Fine mapping of the 1p36 deletion syndrome identifies mutation  
665 of PRDM16 as a cause of cardiomyopathy. *American journal of human genetics*. 2013;93:67-  
666 77. doi: 10.1016/j.ajhg.2013.05.015
- 667 5. Delplancq G, Tarris G, Vitobello A, Nambot S, Sorlin A, Philippe C, Carmignac V, Duffourd Y,  
668 Denis C, Eicher JC, et al. Cardiomyopathy due to PRDM16 mutation: First description of a  
669 fetal presentation, with possible modifier genes. *American journal of medical genetics Part C,  
670 Seminars in medical genetics*. 2020;184:129-135. doi: 10.1002/ajmg.c.31766
- 671 6. van Waning JI, Caliskan K, Hoedemaekers YM, van Spaendonck-Zwarts KY, Baas AF,  
672 Boekholdt SM, van Melle JP, Teske AJ, Asselbergs FW, Backx A, et al. Genetics, Clinical  
673 Features, and Long-Term Outcome of Noncompaction Cardiomyopathy. *Journal of the  
674 American College of Cardiology*. 2018;71:711-722. doi: 10.1016/j.jacc.2017.12.019
- 675 7. Long PA, Evans JM, Olson TM. Diagnostic Yield of Whole Exome Sequencing in Pediatric  
676 Dilated Cardiomyopathy. *J Cardiovasc Dev Dis*. 2017;4. doi: 10.3390/jcdd4030011
- 677 8. Mazzarotto F, Hawley MH, Beltrami M, Beekman L, de Marvao A, McGurk KA, Statton B,  
678 Boschi B, Girolami F, Roberts AM, et al. Systematic large-scale assessment of the genetic  
679 architecture of left ventricular noncompaction reveals diverse etiologies. *Genet Med*.  
680 2021;23:856-864. doi: 10.1038/s41436-020-01049-x
- 681 9. Bjork BC, Turbe-Doan A, Prysak M, Herron BJ, Beier DR. Prdm16 is required for normal  
682 palatogenesis in mice. *Human molecular genetics*. 2010;19:774-789. doi:  
683 10.1093/hmg/ddp543
- 684 10. Wu T, Liang Z, Zhang Z, Liu C, Zhang L, Gu Y, Peterson KL, Evans SM, Fu XD, Chen J.  
685 PRDM16 Is a Compact Myocardium-Enriched Transcription Factor Required to Maintain  
686 Compact Myocardial Cardiomyocyte Identity in Left Ventricle. *Circulation*. 2022;145:586-602.  
687 doi: 10.1161/CIRCULATIONAHA.121.056666
- 688 11. Jiang N, Yang M, Han Y, Zhao H, Sun L. PRDM16 Regulating Adipocyte Transformation and  
689 Thermogenesis: A Promising Therapeutic Target for Obesity and Diabetes. *Frontiers in  
690 Pharmacology*. 2022;13:870250. doi: 10.3389/fphar.2022.870250
- 691 12. Kajimura S, Seale P, Kubota K, Lunsford E, Frangioni JV, Gygi SP, Spiegelman BM. Initiation  
692 of myoblast to brown fat switch by a PRDM16-C/EBP-beta transcriptional complex. *Nature*.  
693 2009;460:1154-1158. doi: 10.1038/nature08262
- 694 13. Kajimura S, Seale P, Tomaru T, Erdjument-Bromage H, Cooper MP, Ruas JL, Chin S, Tempst  
695 P, Lazar MA, Spiegelman BM. Regulation of the brown and white fat gene programs through a  
696 PRDM16/CtBP transcriptional complex. *Genes & development*. 2008;22:1397-1409. doi:  
697 10.1101/gad.1666108
- 698 14. Seale P, Kajimura S, Spiegelman BM. Transcriptional control of brown adipocyte development  
699 and physiological function--of mice and men. *Genes & development*. 2009;23:788-797. doi:  
700 10.1101/gad.1779209
- 701 15. Seale P, Kajimura S, Yang W, Chin S, Rohas LM, Uldry M, Tavernier G, Langin D,  
702 Spiegelman BM. Transcriptional control of brown fat determination by PRDM16. *Cell  
703 metabolism*. 2007;6:38-54. doi: 10.1016/j.cmet.2007.06.001
- 704 16. Harms MJ, Lim HW, Ho Y, Shapira SN, Ishibashi J, Rajakumari S, Steger DJ, Lazar MA, Won  
705 KJ, Seale P. PRDM16 binds MED1 and controls chromatin architecture to determine a brown  
706 fat transcriptional program. *Genes & development*. 2015;29:298-307. doi:  
707 10.1101/gad.252734.114
- 708 17. Seale P, Bjork B, Yang W, Kajimura S, Chin S, Kuang S, Scime A, Devarakonda S, Conroe  
709 HM, Erdjument-Bromage H, et al. PRDM16 controls a brown fat/skeletal muscle switch.  
710 *Nature*. 2008;454:961-967. doi: 10.1038/nature07182
- 711 18. Heinig M, Adriaens ME, Schafer S, van Deutekom HWM, Lodder EM, Ware JS, Schneider V,  
712 Felkin LE, Creemers EE, Meder B, et al. Natural genetic variation of the cardiac transcriptome

- 713 in non-diseased donors and patients with dilated cardiomyopathy. *Genome biology*.  
714 2017;18:170. doi: 10.1186/s13059-017-1286-z
- 715 19. Pomaznoy M, Ha B, Peters B. GONet: a tool for interactive Gene Ontology analysis. *BMC*  
716 *Bioinformatics*. 2018;19:470. doi: 10.1186/s12859-018-2533-3
- 717 20. Wang T, Xie X, Liu H, Chen F, Du J, Wang X, Jiang X, Yu F, Fan H. Pyridine nucleotide-  
718 disulphide oxidoreductase domain 2 (PYROXD2): Role in mitochondrial function.  
719 *Mitochondrion*. 2019;47:114-124. doi: 10.1016/j.mito.2019.05.007
- 720 21. Khumukcham SS, Manavathi B. Two decades of a protooncogene HPIP/PBXIP1: Uncovering  
721 the tale from germ cell to cancer. *Biochim Biophys Acta Rev Cancer*. 2021;1876:188576. doi:  
722 10.1016/j.bbcan.2021.188576
- 723 22. Tham YK, Bernardo BC, Huynh K, Ooi JYY, Gao XM, Kiriazis H, Giles C, Meikle PJ, McMullen  
724 JR. Lipidomic Profiles of the Heart and Circulation in Response to Exercise versus Cardiac  
725 Pathology: A Resource of Potential Biomarkers and Drug Targets. *Cell reports*. 2018;24:2757-  
726 2772. doi: 10.1016/j.celrep.2018.08.017
- 727 23. Wittenbecher C, Eichelmann F, Toledo E, Guasch-Ferre M, Ruiz-Canela M, Li J, Aros F, Lee  
728 CH, Liang L, Salas-Salvado J, et al. Lipid Profiles and Heart Failure Risk: Results From Two  
729 Prospective Studies. *Circulation research*. 2021;128:309-320. doi:  
730 10.1161/CIRCRESAHA.120.317883
- 731 24. Johnson TA, Jinnah HA, Kamatani N. Shortage of Cellular ATP as a Cause of Diseases and  
732 Strategies to Enhance ATP. *Frontiers in pharmacology*. 2019;10:98. doi:  
733 10.3389/fphar.2019.00098
- 734 25. Xie N, Zhang L, Gao W, Huang C, Huber PE, Zhou X, Li C, Shen G, Zou B. NAD(+)  
735 metabolism: pathophysiologic mechanisms and therapeutic potential. *Signal Transduct Target*  
736 *Ther*. 2020;5:227. doi: 10.1038/s41392-020-00311-7
- 737 26. Schunck WH, Konkel A, Fischer R, Weylandt KH. Therapeutic potential of omega-3 fatty acid-  
738 derived epoxyeicosanoids in cardiovascular and inflammatory diseases. *Pharmacology &*  
739 *therapeutics*. 2018;183:177-204. doi: 10.1016/j.pharmthera.2017.10.016
- 740 27. Wang B, Wu L, Chen J, Dong L, Chen C, Wen Z, Hu J, Fleming I, Wang DW. Metabolism  
741 pathways of arachidonic acids: mechanisms and potential therapeutic targets. *Signal*  
742 *Transduct Target Ther*. 2021;6:94. doi: 10.1038/s41392-020-00443-w
- 743 28. Cibi DM, Bi-Lin KW, Shekeran SG, Sandireddy R, Tee N, Singh A, Wu Y, Srinivasan DK,  
744 Kovalik JP, Ghosh S, et al. Prdm16 Deficiency Leads to Age-Dependent Cardiac Hypertrophy,  
745 Adverse Remodeling, Mitochondrial Dysfunction, and Heart Failure. *Cell reports*.  
746 2020;33:108288. doi: 10.1016/j.celrep.2020.108288
- 747 29. Nam JM, Lim JE, Ha TW, Oh B, Kang JO. Cardiac-specific inactivation of Prdm16 effects  
748 cardiac conduction abnormalities and cardiomyopathy-associated phenotypes. *American*  
749 *journal of physiology Heart and circulatory physiology*. 2020;318:H764-H777. doi:  
750 10.1152/ajpheart.00647.2019
- 751 30. Bruneau BG. Transcriptional regulation of vertebrate cardiac morphogenesis. *Circulation*  
752 *research*. 2002;90:509-519. doi: 10.1161/01.res.0000013072.51957.b7
- 753 31. Leszczynski P, Smiech M, Parvanov E, Watanabe C, Mizutani KI, Taniguchi H. Emerging  
754 Roles of PRDM Factors in Stem Cells and Neuronal System: Cofactor Dependent Regulation  
755 of PRDM3/16 and FOG1/2 (Novel PRDM Factors). *Cells*. 2020;9. doi: 10.3390/cells9122603
- 756 32. Iida S, Chen W, Nakadai T, Ohkuma Y, Roeder RG. PRDM16 enhances nuclear receptor-  
757 dependent transcription of the brown fat-specific Ucp1 gene through interactions with Mediator  
758 subunit MED1. *Genes & development*. 2015;29:308-321. doi: 10.1101/gad.252809.114
- 759 33. Seale P, Conroe HM, Estall J, Kajimura S, Frontini A, Ishibashi J, Cohen P, Cinti S,  
760 Spiegelman BM. Prdm16 determines the thermogenic program of subcutaneous white  
761 adipose tissue in mice. *The Journal of clinical investigation*. 2011;121:96-105. doi:  
762 10.1172/JCI44271
- 763 34. Mugoni V, Postel R, Catanzaro V, De Luca E, Turco E, Digilio G, Silengo L, Murphy MP,  
764 Medana C, Stainier DY, et al. Ubiad1 is an antioxidant enzyme that regulates eNOS activity by  
765 CoQ10 synthesis. *Cell*. 2013;152:504-518. doi: 10.1016/j.cell.2013.01.013
- 766 35. Nam D, Chatterjee S, Yin H, Liu R, Lee J, Yechoor VK, Ma K. Novel Function of Rev-erbalpha  
767 in Promoting Brown Adipogenesis. *Scientific reports*. 2015;5:11239. doi: 10.1038/srep11239
- 768 36. Zhao Y, Lu X, Wan F, Gao L, Lin N, He J, Wei L, Dong J, Qin Z, Zhong F, et al. Disruption of  
769 Circadian Rhythms by Shift Work Exacerbates Reperfusion Injury in Myocardial Infarction.  
770 *Journal of the American College of Cardiology*. 2022;79:2097-2115. doi:  
771 10.1016/j.jacc.2022.03.370
- 772 37. Lou B, Boger M, Bennewitz K, Sticht C, Kopf S, Morgenstern J, Fleming T, Hell R, Yuan Z,  
773 Nawroth PP, et al. Elevated 4-hydroxynonenal induces hyperglycaemia via Aldh3a1 loss in

- 774 zebrafish and associates with diabetes progression in humans. *Redox biology*.  
775 2020;37:101723. doi: 10.1016/j.redox.2020.101723
- 776 38. Abramovich C, Shen WF, Pineault N, Imren S, Montpetit B, Largman C, Humphries RK.  
777 Functional cloning and characterization of a novel nonhomeodomain protein that inhibits the  
778 binding of PBX1-HOX complexes to DNA. *The Journal of biological chemistry*.  
779 2000;275:26172-26177. doi: 10.1074/jbc.M001323200
- 780 39. Wang X, Yang Z, Zhang H, Ding L, Li X, Zhu C, Zheng Y, Ye Q. The estrogen receptor-  
781 interacting protein HPIP increases estrogen-responsive gene expression through activation of  
782 MAPK and AKT. *Biochimica et biophysica acta*. 2008;1783:1220-1228. doi:  
783 10.1016/j.bbamcr.2008.01.026
- 784 40. Moreno D, Viana R, Sanz P. Two-hybrid analysis identifies PSMD11, a non-ATPase subunit of  
785 the proteasome, as a novel interaction partner of AMP-activated protein kinase. *The*  
786 *international journal of biochemistry & cell biology*. 2009;41:2431-2439. doi:  
787 10.1016/j.biocel.2009.07.002
- 788 41. Grimes KA, Pyo A, Molkentin JD. Abstract 918: Pre-B-cell Leukemia Homeobox Interacting  
789 Protein 1 is a Novel Regulator of Growth Signaling in the Heart. *Circulation research*.  
790 2019;125.
- 791 42. Alankarage D, Szot JO, Pachter N, Slavotinek A, Selleri L, Shieh JT, Winlaw D, Giannoulatou  
792 E, Chapman G, Dunwoodie SL. Functional characterization of a novel PBX1 de novo  
793 missense variant identified in a patient with syndromic congenital heart disease. *Human*  
794 *molecular genetics*. 2020;29:1068-1082. doi: 10.1093/hmg/ddz231
- 795 43. Van Bergen NJ, Hock DH, Spencer L, Massey S, Stait T, Stark Z, Lunke S, Roesley A, Peters  
796 H, Lee JY, et al. Biallelic Variants in PYROXD2 Cause a Severe Infantile Metabolic Disorder  
797 Affecting Mitochondrial Function. *International journal of molecular sciences*. 2022;23. doi:  
798 10.3390/ijms23020986
- 799 44. O'Grady GL, Best HA, Sztal TE, Schartner V, Sanjuan-Vazquez M, Donkervoort S, Abath  
800 Neto O, Sutton RB, Ilkovski B, Romero NB, et al. Variants in the Oxidoreductase PYROXD1  
801 Cause Early-Onset Myopathy with Internalized Nuclei and Myofibrillar Disorganization.  
802 *American journal of human genetics*. 2016;99:1086-1105. doi: 10.1016/j.ajhg.2016.09.005
- 803 45. Caspi T, Straw S, Cheng C, Garnham JO, Scragg JL, Smith J, Koshy AO, Levelt E, Sukumar  
804 P, Gierula J, et al. Unique Transcriptome Signature Distinguishes Patients With Heart Failure  
805 With Myopathy. *Journal of the American Heart Association*. 2020;9:e017091. doi:  
806 10.1161/JAHA.120.017091
- 807 46. Berndt N, Eckstein J, Wallach I, Nordmeyer S, Kelm M, Kirchner M, Goubergits L,  
808 Schafstedde M, Hennemuth A, Kraus M, et al. CARDIOKIN1: Computational Assessment of  
809 Myocardial Metabolic Capability in Healthy Controls and Patients With Valve Diseases.  
810 *Circulation*. 2021;144:1926-1939. doi: 10.1161/CIRCULATIONAHA.121.055646
- 811 47. Walker CJ, Schroeder ME, Aguado BA, Anseth KS, Leinwand LA. Matters of the heart:  
812 Cellular sex differences. *Journal of molecular and cellular cardiology*. 2021;160:42-55. doi:  
813 10.1016/j.yjmcc.2021.04.010
- 814 48. Lopaschuk GD, Karwi QG, Tian R, Wende AR, Abel ED. Cardiac Energy Metabolism in Heart  
815 Failure. *Circulation research*. 2021;128:1487-1513. doi: 10.1161/CIRCRESAHA.121.318241
- 816 49. Sosnowski DK, Jamieson KL, Darwesh AM, Zhang H, Keshavarz-Bahaghighat H, Valencia R,  
817 Viveiros A, Edin ML, Zeldin DC, Oudit GY, et al. Changes in the Left Ventricular Eicosanoid  
818 Profile in Human Dilated Cardiomyopathy. *Front Cardiovasc Med*. 2022;9:879209. doi:  
819 10.3389/fcvm.2022.879209
- 820  
821



822 **Figures**

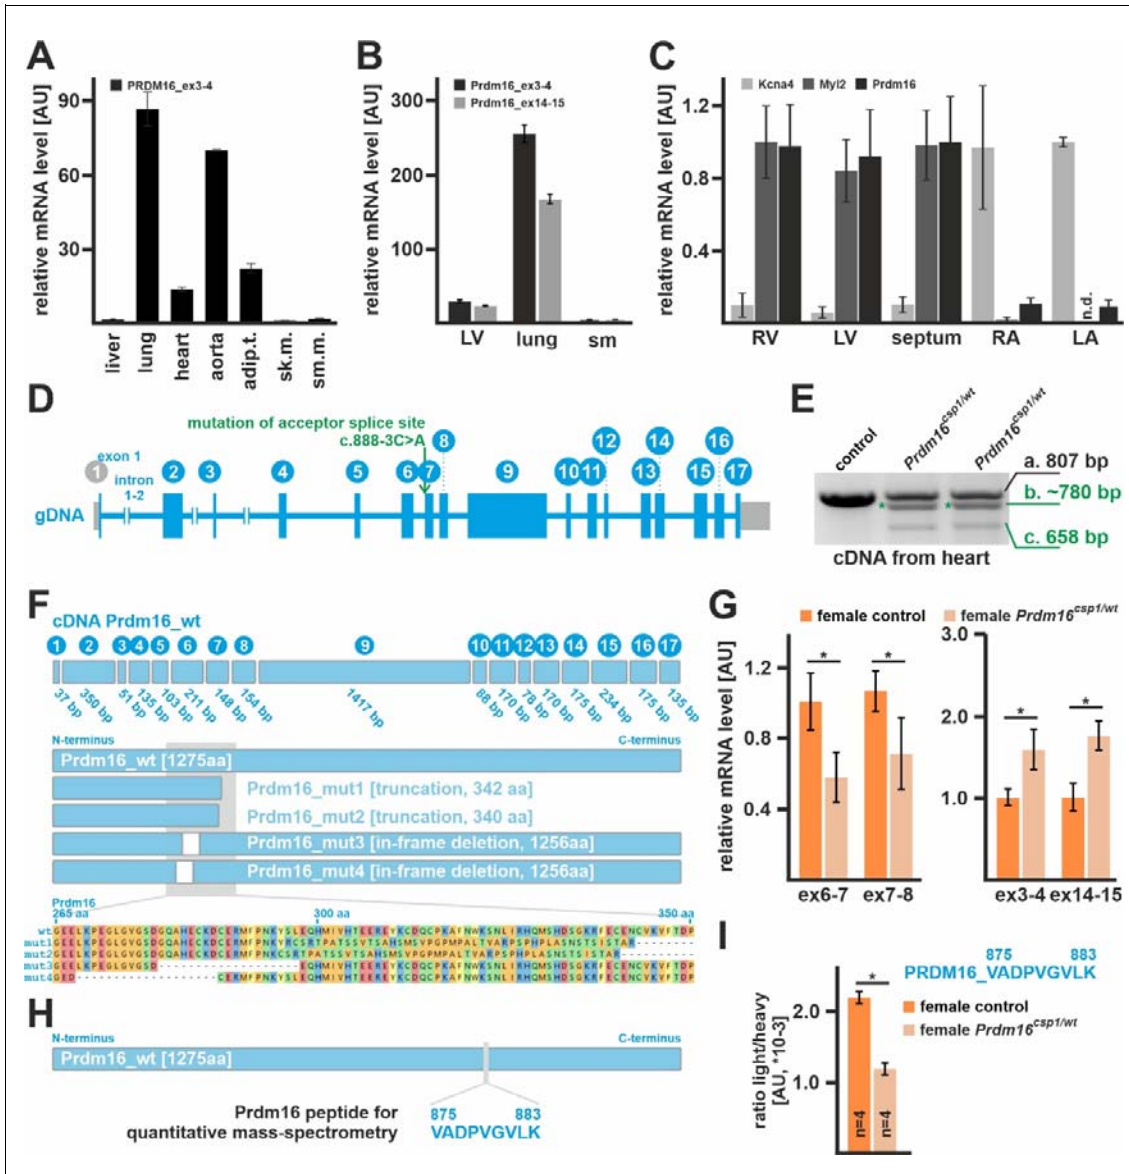

**Figure 1. Expression of *Prdm16* in the heart of *Prdm16*<sup>csp1/wt</sup> mice. (A) Expression analysis reveals high *PRDM16* transcript levels in human lung, aorta, adipose tissue (adip.t.), and heart. Liver, skeletal muscle (sk.m.), and smooth muscle (sm.m.) show low *PRDM16* expression. (B) *Prdm16* is highly expressed in murine lung tissue, shows robust levels in the left ventricle (LV) but low expression in skeletal muscle (sm). (C) *Prdm16* is robustly expressed in LV, right ventricle (RV), and the septum. The left (LA) and right atrium (RA) does not show considerable *Prdm16* expression. *Kcna4* and *Myl2* transcripts demonstrate atrial and ventricular tissue origin. (D) The murine *Prdm16* gene comprises 17 exons and *Prdm16*<sup>csp1/wt</sup> mice carry the point mutation c.888-3C>A affecting the acceptor splice site of intron\_6-7. (E) PCR genotyping with heart cDNA from heterozygous *Prdm16*<sup>csp1/wt</sup> mice generates 3 products: a) wild-type fragment (807 bp), b) unknown mutant product (~780 bp, \*), and c) mutant product without exon 7 (658 bp). (F) The wild-type *Prdm16* protein is 1275 amino acids (aa) long. Targeted high-throughput sequencing of the different PCR products identifies four main *Prdm16* mutant proteins in *Prdm16*<sup>csp1/wt</sup> mice including truncation (mut1, mut2) and in-frame deletion (mut3, mut4) variants (Figure I and II in the Data Supplement, for detailed Results see Data Supplement). (G) Quantitative detection of *Prdm16* transcript levels with qPCR detectors targeting the exon**

7 deletion region shows approx. 40-50% reduced expression. In contrast, PCR detectors targeting exon3-4 and exon14-15 identifies increased *Prdm16* levels. Analysis was performed on female *Prdm16*<sup>csp1/wt</sup> heart tissue. **(H)** Detection of Prdm16 protein was achieved by PRM (parallel-reaction monitoring) using the Prdm16 derived peptide V875-K883. **(I)** Quantitation of Prdm16 peptide in control and *Prdm16*<sup>csp1/wt</sup> lung tissue. The ratio of endogenous (light) and standard spike-in (heavy) peptide is shown. Statistical analysis was performed with unpaired t-test (p<0.05).

824

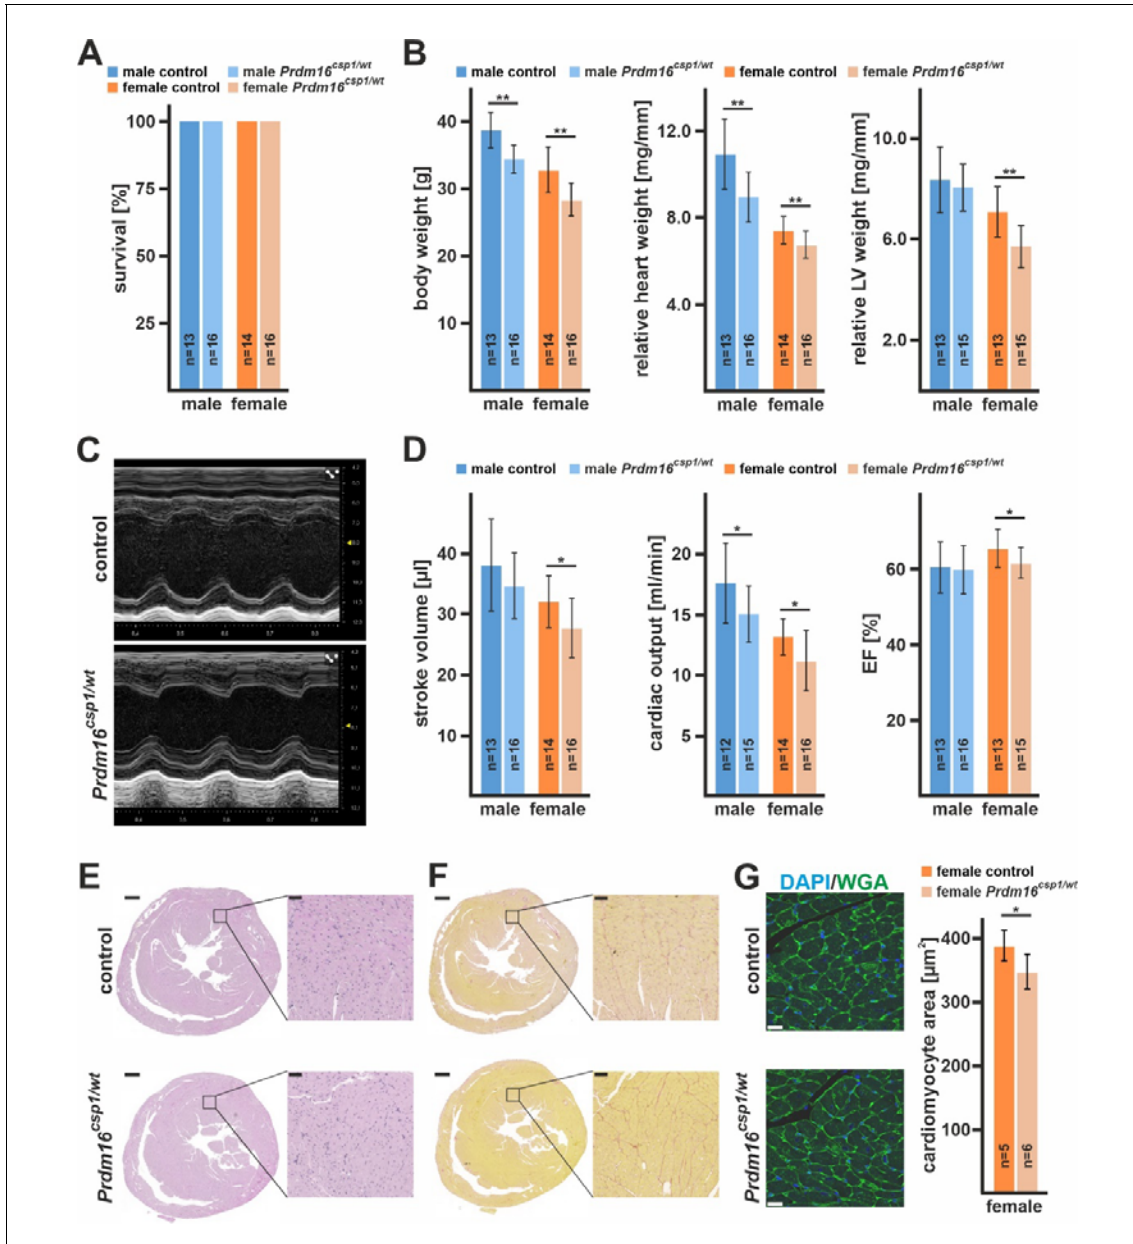

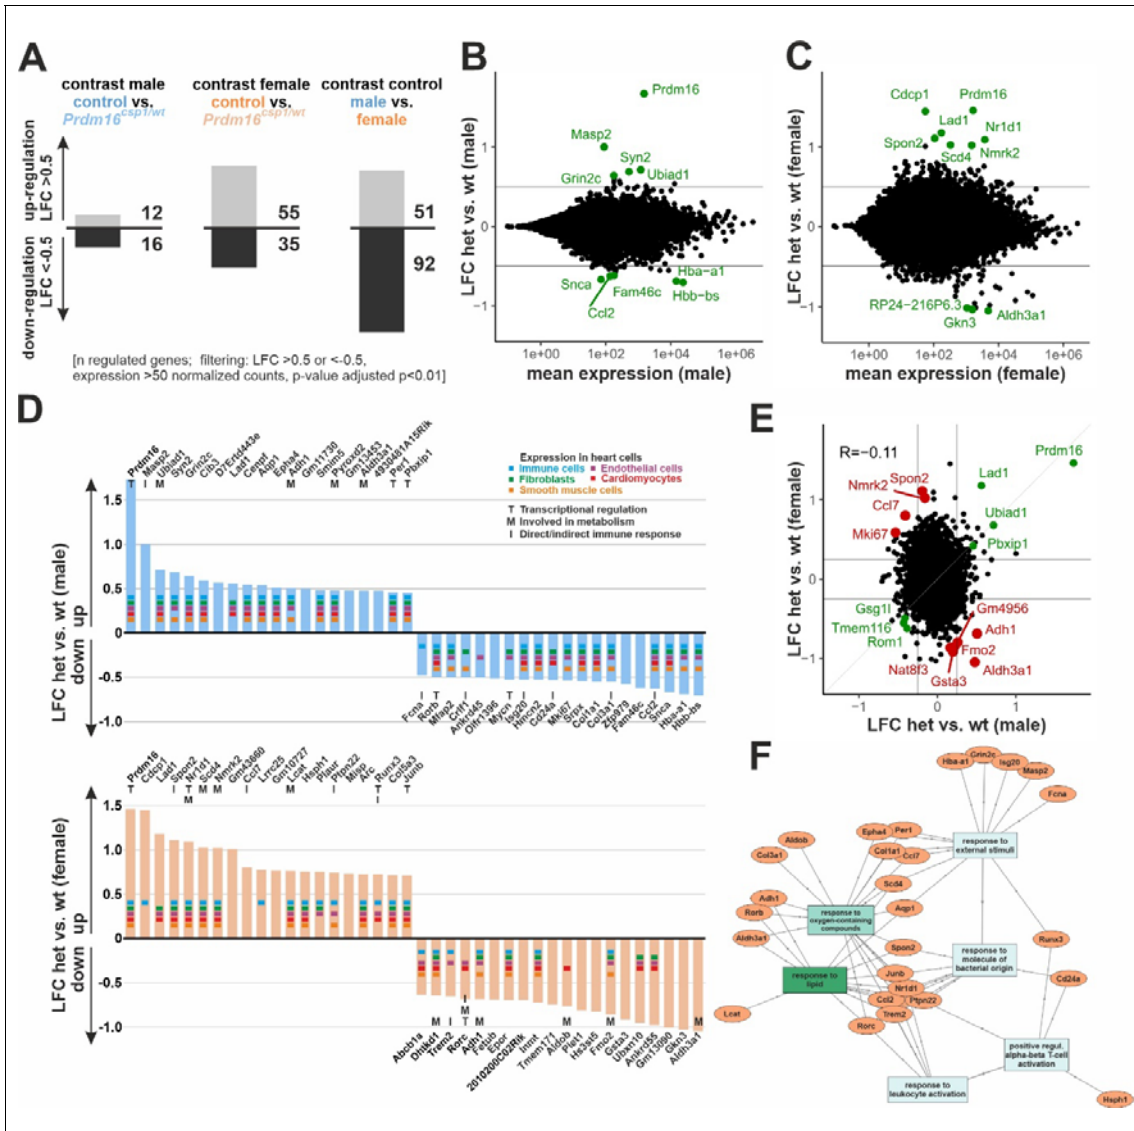

**Figure 3. Transcriptome analysis of *Prdm16<sup>cspl/wt</sup>* heart tissue. (A) Transcriptome analysis with RNAseq of *Prdm16<sup>cspl/wt</sup>* LV shows in male 28 and in female 90 differentially regulated genes compared to controls. Analysis of male vs. female control hearts identifies 143 differentially regulated transcripts. (B-C) Bioinformatic filtering ranked the normalized log2 cpk according to the absolute log2 fold change (LFC) after elimination of regulated targets with an adjusted p-value (padj) <10<sup>-2</sup>. Scatterplots show the LFC against mean expression for the contrast *Prdm16<sup>cspl/wt</sup>* (het) vs controls (wt) in male (B) or female (C) heart. The top 10 differentially regulated genes (adj. p < 0.01) are highlighted in green and labeled. (D) Summary of top 20 up- and down-regulated genes in male (upper panel) and female (lower panel) hearts. Expression of selected genes in cardiac cell types is annotated according to the color code. Functional association with transcription (T), metabolism (M), and immune response (I) is shown for relevant genes. (E) Scatterplot shows the LFC detected in A and B against each other. Genes with concordant changes (abs LFC > 0.25) are highlighted in green, genes with discordant changes (top 10; adj. p < 0.01) are highlighted in red. The overall correlation is R=-0.11 (n=21276). (F) Gene ontology (GO) network was constructed with GOnet<sup>19</sup> by using the male and female TOP20 up- and down-regulated genes in *Prdm16<sup>cspl/wt</sup>* hearts. GO terms *response to lipids* and *response to oxygen-containing compounds* show strongest association.**

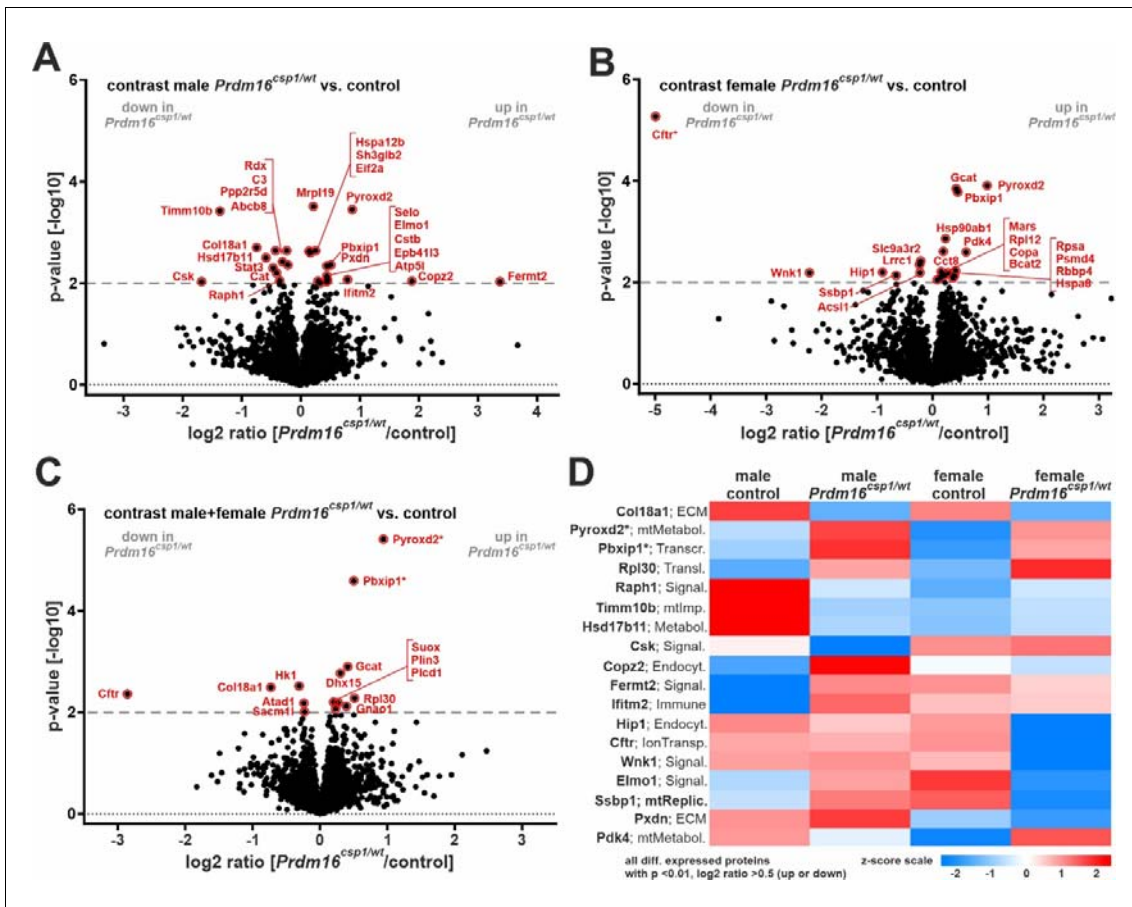

**Figure 4. Proteome comparison of *Prdm16*<sup>esp1/wt</sup> cardiac tissue.** Volcano plots for *Prdm16*<sup>esp1/wt</sup>/control pairwise comparisons with log<sub>2</sub> ratio (x-axis) and p-value (y-axis) of male hearts (A), female hearts (B), and combined analysis of male+female hearts (C). Red coloring indicates significantly altered proteins (threshold dashed grey line, p-value <0.01) and \* highlights highly significantly different proteins with p-value <0.0001. (D) Heat map of all regulated proteins (p-value <0.01, abs log<sub>2</sub> ratio >0.5) using z-scored values of group median intensity. Pre B-cell leukemia transcription factor interacting protein 1 (Pbxip1) and pyridine nucleotide-disulphide oxidoreductase domain 2 (Pyroxd2) are consistently increased in male and female *Prdm16*<sup>esp1/wt</sup> mice with p-value <0.0001.

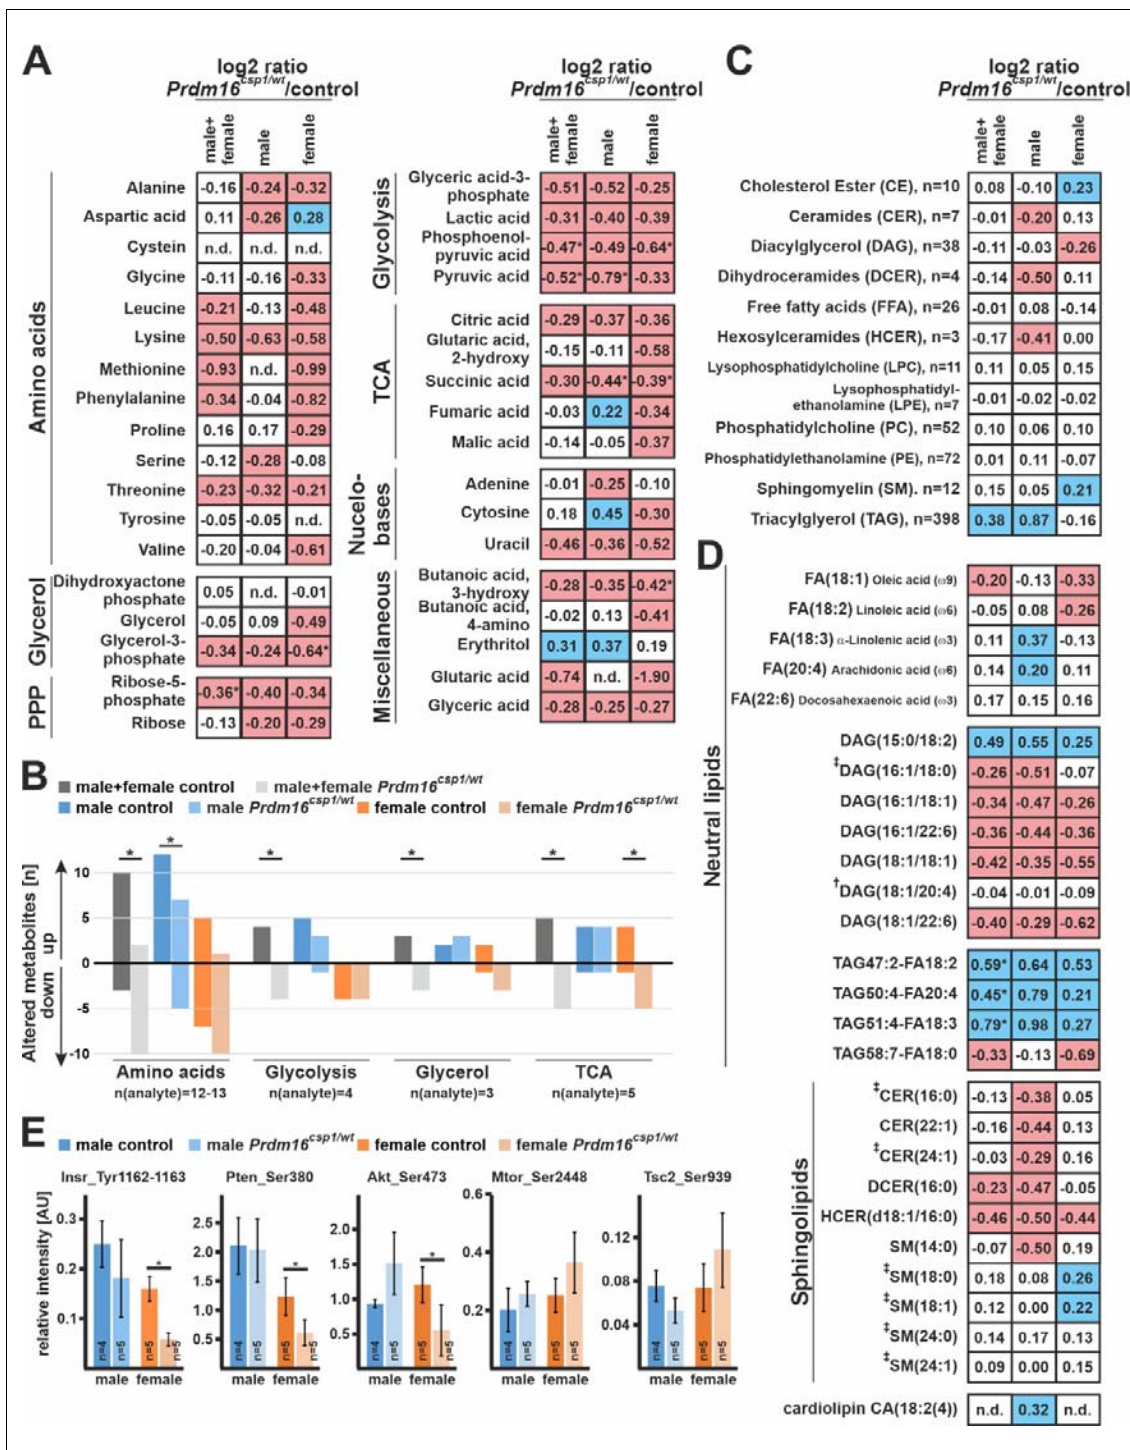

**Figure 5. Altered metabolism in *Prdm16<sup>csp1/wt</sup>* cardiac tissue. (A)** Normalized central carbon metabolite counts are presented as log<sub>2</sub> value of the mean of normalized peak area ratio *Prdm16<sup>csp1/wt</sup>*/controls of males, females, and combination of both sexes. In female *Prdm16<sup>csp1/wt</sup>* LV tissue, broad suppression of several metabolic pathways was observed. In male *Prdm16<sup>csp1/wt</sup>* LV tissue, a similar but less pronounced reduction was detected. Statistical analysis of individual metabolites was performed with non-parametric Wilcoxon Rank Sum test, \*indicates p<0.05. **(B)** Univariate analysis reveals in cardiac tissue of *Prdm16<sup>csp1/wt</sup>* mice significant reduction of the amino acid, glycolysis, glycerol, and tricarboxylic acid cycle (TCA) metabolism using combined male and female data. Divergent metabolism of male and female animals was observed for amino acid

metabolism, glycolysis, and TCA cycle. **(C)** Lipid analysis was performed with LC-MS using the lipidizer kit (Sciex). Global lipid analysis and evaluation as log<sub>2</sub> value of the intensity ratio *Prdm16*<sup>csp1/wt</sup>/controls reveals normal levels for most lipid classes. Strongest regulation was observed for triacylglycerol (TAG) in male *Prdm16*<sup>csp1/wt</sup> hearts. The number (n) of validly detected lipids per class is indicated. **(D)** Selected neutral lipids and sphingolipids critical for the heart, lipids altered in *Prdm16*<sup>csp1/wt</sup> mice, and lipids previously associated with heart function (†*Tham* et al. <sup>22</sup>, ‡*Wittenbecher* et al. <sup>23</sup>) are presented for *Prdm16*<sup>csp1/wt</sup> cardiac tissue of both sexes and in combination. Values for phospholipids are available in Figure IX in the Data Supplement. **(E)** Signaling activity of the mitogen-activated protein kinase (MAPK) and mTOR pathway was assessed with the Milliplex phosphoprotein magnetic bead system and revealed diminished phosphorylation of insulin receptor (Insr\_Tyr1162-1163), phosphatase and tensin homolog (Pten\_Ser380), and Akt serine/threonine kinase 2 (Akt\_Ser473) in female *Prdm16*<sup>csp1/wt</sup> mice. Statistical analysis of selected lipids was performed with non-parametric Wilcoxon Sum Rank test, \* indicates p<0.05. Coloring indicates reduction (red) or increase (blue) of the log<sub>2</sub> of ratio by -0.2 or 0.2, respectively.

827

828

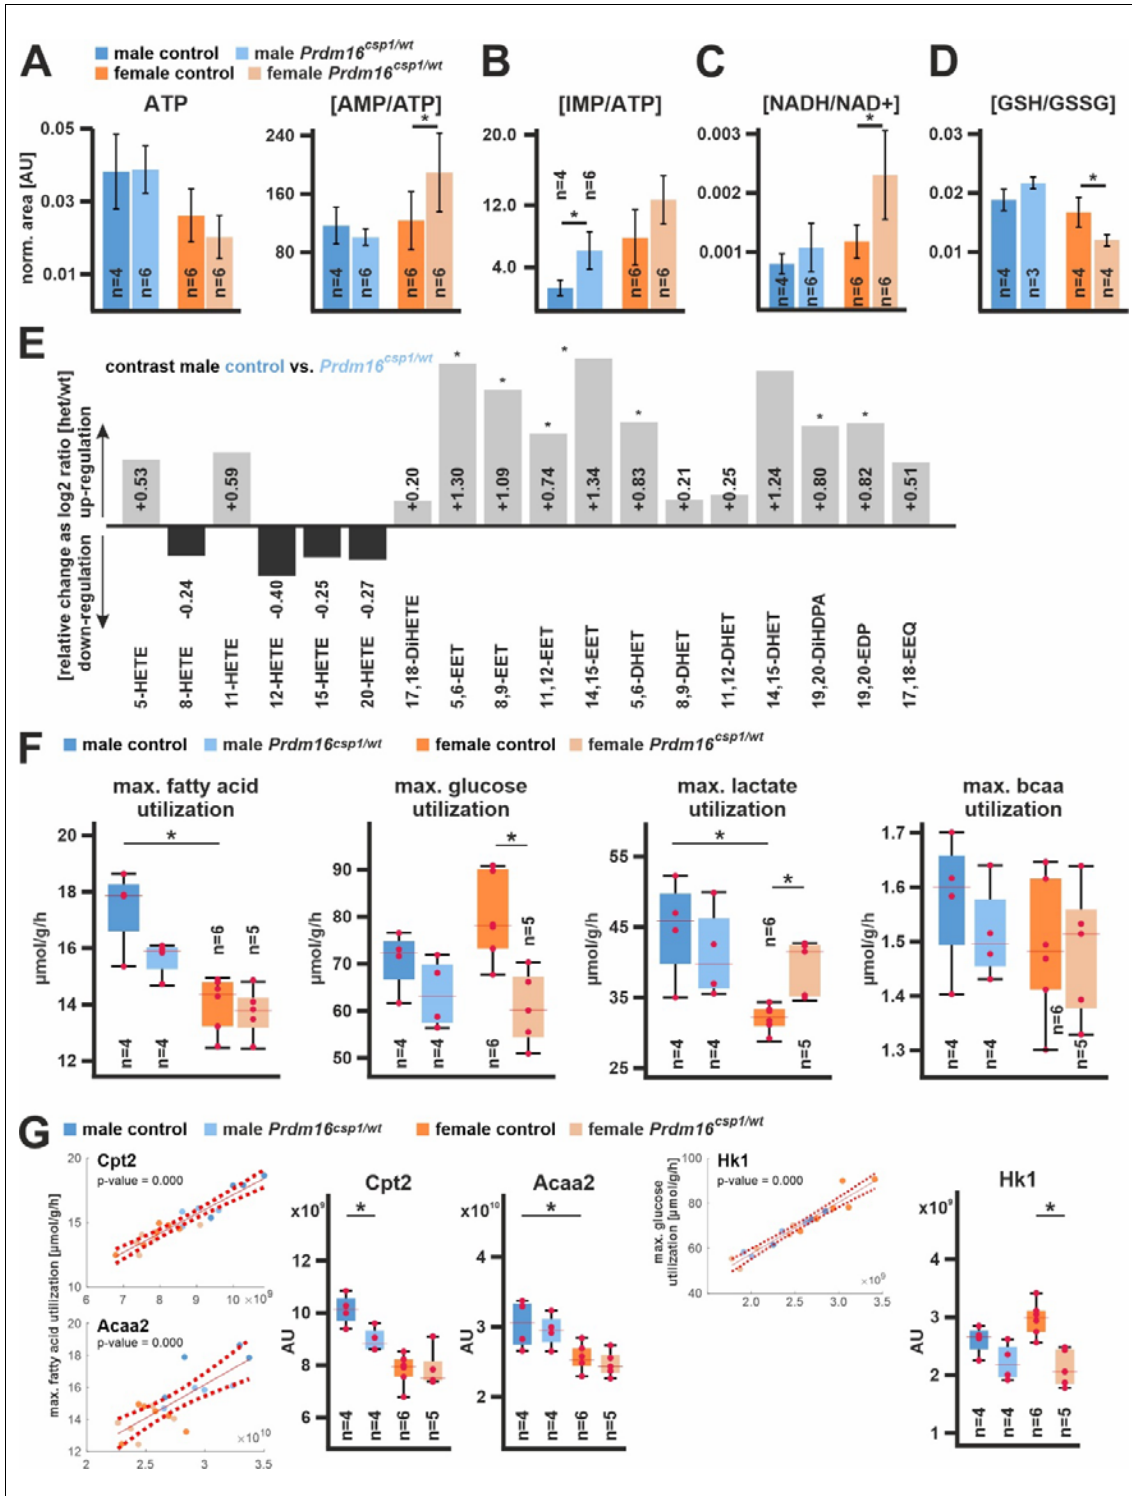

**Figure 6. Nutrient metabolism in *Prdm16*<sup>csp1/wt</sup> cardiac tissue. (A)** Assessment of metabolites critical for energy metabolism using LV tissue and LC-MS. Normalized values are shown for adenosine triphosphate (ATP) and the ratio of adenosine monophosphate (AMP) vs. ATP (AMP/ATP). **(B)** The ratio of inosine monophosphate (IMP) vs. ATP (IMP/ATP) is increased in *Prdm16*<sup>csp1/wt</sup> hearts. **(C)** The ratio of reduced vs. oxidized nicotinamide adenine dinucleotide (NADH/NAD<sup>+</sup>) is increased in female *Prdm16*<sup>csp1/wt</sup> hearts. **(D)** Oxidative capacity of cardiac tissues was assessed with the ratio of reduced vs.



oxidized glutathione (GSH/GSSG). Female *Prdm16*<sup>csp1/wt</sup> hearts show a significantly reduced GSH/GSSG ratio. **(E)** Eicosanoids were measured in male *Prdm16*<sup>csp1/wt</sup> hearts with LC/ESI-MS-MS. Data are presented as log<sub>2</sub> *Prdm16*<sup>csp1/wt</sup>/controls ratio with down- or up-regulation as black or grey bars, respectively. All epoxyeicosatrienoic (EET) and dihydroxyeicosatrienoic (DHET) acids are increased in *Prdm16*<sup>csp1/wt</sup> cardiac tissue. Corresponding absolute measurements are available in Table VIII in the Data Supplement. **(F)** Modelling of major cardiac metabolic processes occurred with CARDIOKIN1<sup>46</sup> using protein expression data. Differences in maximal substrate utilization for fatty acids (FA), glucose, lactate, and branched chain amino acids (bcaa). Box plots show median and 25% quartile. Red dots depict maximal capacities for individual animals. **(G)** Individual protein impact for FA and glucose metabolism was correlated for carnitine palmitoyltransferase 2 (Cpt2), acetyl-CoA acyltransferase 2 (Acaa2), and hexokinase 1 (Hk1) using linear regression analysis of the maximal substrate utilization vs. protein abundance (red dashed line indicates confidence interval, 95%). Box plots show median and 25% quartile. Red dots depict Cpt2, Acaa2, and Hk1 maximal capacities for individual animals. Statistical analysis of individual metabolites and processes was performed with unpaired t-test, \* indicates p<0.05.

830

831

832

|                            | Control <i>Prdm16</i>                                                                           | Monoallelic <i>Prdm16</i> deficiency                                                            | Biallelic <i>Prdm16</i> deficiency                                                                                                          |
|----------------------------|-------------------------------------------------------------------------------------------------|-------------------------------------------------------------------------------------------------|---------------------------------------------------------------------------------------------------------------------------------------------|
| <b>Mouse models</b>        |                                                                                                 | <i>Prdm16</i> <sup>csp1/wt</sup>                                                                | <i>Prdm16</i> <sup>csp1/csp1</sup><br><i>Xmlc2Cre;Prdm16</i> <sup>fllox/fllox</sup><br><i>Mesp1Cre;Prdm16</i> <sup>fllox/fllox</sup>        |
| <b>Survival</b>            | unaffected                                                                                      | unaffected                                                                                      | postnatal or premature death                                                                                                                |
| <b>Cardiac function</b>    | unaffected                                                                                      | ↓                                                                                               | ↓↓                                                                                                                                          |
| <b>Heart size</b>          | <br>unaffected | <br>hypoplasia | <br>hypoplasia (early stage)<br>hypertrophy (late stage) |
| <b>Metabolism</b>          | unaffected                                                                                      | males fatty acid ↓<br>females glucose ↓                                                         | glucose & fatty acid metabolism ↓↓                                                                                                          |
| <b>Mitochondria</b>        | unaffected                                                                                      | unaffected                                                                                      | mitochondrial dysfunction                                                                                                                   |
| <b>Oxidative stress</b>    | unaffected                                                                                      | ↑                                                                                               | ↑                                                                                                                                           |
| <b>Molecular mechanism</b> |                                                                                                 | upregulation<br>Pyroxd2, Pbxip                                                                  | upregulation hypertrophy genes<br>Nppa/Nppb, Myh7<br>upregulation trabeculation genes                                                       |
| <b>Sex</b>                 |                                                                                                 | females more affected compared to males (early stage pathology)                                 | not investigated                                                                                                                            |

**Figure 7. Prdm16 is an early regulator of cardiac metabolism.** Assessing different mouse models for the *PRDM16* associated cardiomyopathy reveals distinct cardiac phenotypes after mono- or biallelic *Prdm16* inactivation. Metabolism is differentially affected at early (*Prdm16*<sup>csp1/wt</sup>) and late pathology stage (*Xmlc2Cre;Prdm16*<sup>fllox/fllox</sup>, *Mesp1Cre;Prdm16*<sup>fllox/fllox</sup>).<sup>10,28</sup>

833
